# Supplementary material for: CO2 uptake prediction of metal–organic frameworks using quasi-SMILES and Monte Carlo optimization
Source: Royal Society of Chemistry journal article supplement (doi:10.1039/d2nj00596d), 2022-01-01
Supplement: d2nj00596d1.pdf [file d2nj00596d1.pdf]

## Supporting Information

### **CO<sub>2</sub> Uptake Prediction in Metal–Organic Frameworks Using Quasi-SMILES Based on Monte Carlo Method**

Shahin Ahmadi <sup>1,\*</sup>, Sepideh Ketabi <sup>1,†</sup>, Mahnaz Qomi <sup>2,3</sup>

*<sup>1</sup>Department of Chemistry, Faculty of Pharmaceutical Chemistry, Tehran Medical Sciences, Islamic Azad University, Tehran, Iran*

*<sup>2</sup>Department of Medicinal Chemistry, Faculty of Pharmacy, Tehran Medical Sciences, Islamic Azad University, Tehran, Iran*

*<sup>3</sup>Active Pharmaceutical Ingredients Research (APIRC), Tehran Medical Sciences, Islamic Azad University, Tehran, Iran*

---

\* Corresponding author email: [ahmadi.chemometrics@gmail.com](mailto:ahmadi.chemometrics@gmail.com)

† Corresponding author email: [sepidehketabi@yahoo.com](mailto:sepidehketabi@yahoo.com)

## Supporting Information

**Table S1.** The CO<sub>2</sub> uptake capacity data in different physical conditions of temperature and pressure using MOFs with different BET and pore volume characteristics

| No. | MOF                                                   | Organic linker                                                                                                                             | Surface area, BET (m <sup>2</sup> /g) | Pore volume (cm <sup>3</sup> /g) | P(bar) | T(K) | CO <sub>2</sub> uptake (mol/kg) | Ref.     |
|-----|-------------------------------------------------------|--------------------------------------------------------------------------------------------------------------------------------------------|---------------------------------------|----------------------------------|--------|------|---------------------------------|----------|
| 1   | HKUST-1 (CuBTC)                                       | BTC: Benzene-1,3,5-tricarboxylic acid, H3BTC, TMA, Trimesic acid                                                                           | 1270                                  | 0.71                             | 0.15   | 298  | 0.86                            | [S1]     |
| 2   |                                                       |                                                                                                                                            | 1270                                  | 0.71                             | 1      | 298  | 5.27                            | [S2]     |
| 3   |                                                       |                                                                                                                                            | 1270                                  | 0.71                             | 1      | 313  | 2.91                            | [S3]     |
| 4   | IRMOF-1 (MOF-5)                                       | 1,4-benzendicarboxylic acid (Terephthalic acid)                                                                                            | 2833                                  | 1.04                             | 35     | 298  | 21.7                            | [S4]     |
| 5   | IRMOF-3                                               | 2-Aminoterephthalic acid                                                                                                                   | 1568                                  | 1.07                             | 35     | 298  | 18.7                            | [S4]     |
| 6   |                                                       |                                                                                                                                            | 1568                                  | 1.07                             | 1      | 298  | 1.11                            | [S5]     |
| 7   | MIL-47 (V)<br>(MIL= Materials of Institute Lavoisier) | 1,4-benzendicarboxylic acid (Terephthalic acid)                                                                                            | 1049                                  | 0.36                             | 20     | 304  | 11.5                            | [S6]     |
| 8   | MIL-53 (Cr)                                           | TPA, H2BDC, Terephthalic acid                                                                                                              | 1419                                  | 0.5                              | 25     | 304  | 10                              | [S6]     |
| 9   | MIL-100 (Cr)                                          | (Trimesic acid)(TMA)(1,3,5-BTC)                                                                                                            | 1900                                  | 1.1                              | 50     | 304  | 18                              | [S7]     |
| 10  | MIL-100 (Fe)                                          | (Trimesic acid)(TMA)(1,3,5-BTC)                                                                                                            | 1900                                  | 1.1                              | 1      | 313  | 1.5                             | [S3]     |
| 11  | MIL-101 (Cr)                                          | TPA, H2BDC, Terephthalic acid                                                                                                              | 2988                                  | 1.853                            | 50     | 304  | 40                              | [S7]     |
| 12  |                                                       |                                                                                                                                            | 2988                                  | 1.853                            | 1      | 298  | 2.16                            | [S2]     |
| 13  | MOF-74-Mg                                             | H4DOBDC (2,5-dihydroxyterephthalic acid)                                                                                                   | 1495                                  | 0.61                             | 1      | 298  | 6.2                             | [S2]     |
| 14  |                                                       |                                                                                                                                            | 1174                                  | 0.648                            | 35     | 298  | 10.4                            | [S4]     |
| 15  |                                                       |                                                                                                                                            | 1174                                  | 0.648                            | 1      | 298  | 8.6                             |          |
| 16  |                                                       |                                                                                                                                            | 1174                                  | 0.648                            | 0.15   | 298  | 6.14                            |          |
| 17  | MOF-177                                               | 4-[3,5-bis(4-carboxyphenyl)phenyl]benzoic acid (BTB)                                                                                       | 4750                                  | 1.89                             | 20     | 298  | 28                              | [S5, S8] |
| 18  |                                                       |                                                                                                                                            | 4750                                  | 1.89                             | 20     | 273  | 33.5                            |          |
| 19  | MOF-200                                               | 4,4',4''-[benzene-1,3,5-triyl-tris(benzene-4,1-diyl)]tribenzoate (BBC)                                                                     | 4530                                  | 3.59                             | 50     | 298  | 54.5                            | [S9]     |
| 20  |                                                       |                                                                                                                                            | 4530                                  | 3.59                             | 20     | 273  | 54.4                            |          |
| 21  |                                                       |                                                                                                                                            | 4530                                  | 3.59                             | 20     | 298  | 14.8                            |          |
| 22  | MOF-210                                               | BTE/biphenyl-4,4'-dicarboxylate (BPDC)                                                                                                     | 6240                                  | 3.6                              | 50     | 298  | 54.5                            | [S9]     |
| 23  | MOF-505                                               | H4BPTC (Biphenyl-3,3',5,5'-tetracarboxylic acid)                                                                                           | 1547                                  | 0.63                             | 35     | 298  | 10.2                            | [S4]     |
| 24  | NU-100                                                | large hexatopic carboxylate ligand (LH6):<br>5,5',5''-(((benzene-1,3,5-triyl)tris(ethyne-2,1-diyl))tris(benzene-4,1-diyl))tris(ethyne-2,1- | 6143                                  | 2.82                             | 40     | 298  | 46.4                            | [S10]    |

|    |                                              |                                                                                                      |       |       |      |     |         |       |
|----|----------------------------------------------|------------------------------------------------------------------------------------------------------|-------|-------|------|-----|---------|-------|
|    |                                              | diyl)trisisophthalic acid                                                                            |       |       |      |     |         |       |
| 25 | UMCM-1                                       | H3BTB(1,3,5-Tris(4-carboxyphenyl)benzene )                                                           | 4100  | 2.14  | 24   | 298 | 23.5    | [S11] |
| 26 | USO-2-Ni                                     | 1,4-dicarboxylic-2-amino-benzene (2-aminoterephthalic acid)                                          | 1925  | 0.74  | 25   | 298 | 13.6    | [S12] |
| 27 | Zn4O(FMA)3                                   | FMA: fumarate                                                                                        | 1120  | 0.586 | 28   | 300 | 15.7    | [S13] |
| 28 |                                              |                                                                                                      | 1120  | 0.586 | 1    | 298 | 0.89    |       |
| 29 | Zn9O3(2,7-ndc)6(dmf)3                        | 2,7-ndc: 2,7-naphthalene dicarboxylic acid ;dmf: dimethylformamide                                   | 834   | 0.41  | 40   | 298 | 7.1     | [S14] |
| 30 | SIFSIX-2-Cu-i                                | Dipyridylacetylene(bis(4-pyridyl)acetylene)or(4,4'-(1,2-Ethynediyl)dipyridine)                       | 735   | 0.26  | 0.01 | 298 | 0.19    | [S15] |
| 31 |                                              |                                                                                                      | 735   | 0.26  | 1    | 298 | 5.41    | [S16] |
| 32 | PEI-MIL-101(Cr)                              | polyethylenimine-H2NDC (2,6-Naphthalenedicarboxylic acid)                                            | 182.9 | 0.095 | 0.15 | 298 | 3.85    | [S17] |
| 33 |                                              |                                                                                                      | 182.9 | 0.095 | 1    | 298 | 4.38    |       |
| 34 | UPC-12                                       | cyclohexane-1,2,3,4,5,6-hexacarboxylic acid and 4,4'-bipyridine                                      | 271.8 | 0.126 | 1    | 273 | 1.5     | [S18] |
| 35 | NENU-520(NENU = Northeast Normal University) | 4'-(1H-tetrazol-5-yl)-[1,1'-biphenyl]-4-carboxylic acid                                              | 387   | 0.27  | 1    | 298 | 2.71    | [S19] |
| 36 | SMT-1('single molecule trap')                | 3,3'-(naphthalene-2, 7-diyl)dibenzoic acid (H2L)                                                     | 153.7 | 0.097 | 1    | 196 | 2.32    | [S20] |
| 37 |                                              |                                                                                                      | 153.7 | 0.097 | 1    | 273 | 0.85    |       |
| 38 |                                              |                                                                                                      | 153.7 | 0.097 | 1    | 296 | 0.63    |       |
| 39 | MIL-120(AI4(OH)8(BTEC))                      | (BTEC)=1,2,4,5-benzenetetracarboxylic acid                                                           | 308   | 0.11  | 1    | 303 | 3.152   | [S21] |
| 40 | Zn4(OH)2(1,2,4-BTC)2=MOF-1                   | 1,2,4-BTC=benzene-1,2,4-tricarboxylate=Trimellitic acid                                              | 408   | 0.205 | 1    | 295 | 1.879   | [S22] |
| 41 | Cu2(BTTCD)=PCN-80                            | H8BTTCD=9,9',9'',9'''-(1,1'-biphenyl)-3,3',5,5'-tetrayl)tetrakis(9H-carbazole-3,6-dicarboxylic acid) | 3850  | 1.47  | 1    | 296 | 3.036   | [S23] |
| 42 | MAF-X27ox                                    | (OH)Cl2(bbta)[(OH)Cl2(benzo(1,2-d:4,5-d')bistriazole)]                                               | 1167  | 0.56  | 1    | 298 | 6.7     | [S24] |
| 43 | MAF-X25ox                                    | (OH)Cl2(bbta)[(OH)Cl2(benzo(1,2-d:4,5-d')bistriazole)]                                               | 1286  | 0.46  | 1    | 298 | 7.1     | [S24] |
| 44 | MAF-66                                       | 3-amino-1,2,4-triazole (Hatz)                                                                        | 1014  | 0.43  | 1    | 298 | 4.41    | [S25] |
| 45 | ZJNU-41                                      | (H4L1)= 5,5'-(Benzo[c][1,2,5]furanan-4,7-diyl) diisophthalate (H4L1)(Oxadiazole functional group)    | 2530  | 0.997 | 1    | 298 | 4.34821 | [S26] |
| 46 |                                              |                                                                                                      | 2530  | 0.997 | 1    | 288 | 5.54464 |       |

|    |                                                              |                                                                                                                                        |      |       |    |     |         |       |
|----|--------------------------------------------------------------|----------------------------------------------------------------------------------------------------------------------------------------|------|-------|----|-----|---------|-------|
| 47 | ZJNU-40                                                      | (H4L2)(Thiadiazole functional group)=5,5'-(benzo[c][1,2,5]thiadiazole-4,7-diyl)diisophthalic acid                                      | 2072 | 0.837 | 1  | 298 | 3.82589 | [S26] |
| 48 |                                                              |                                                                                                                                        | 2072 | 0.837 | 1  | 288 | 4.87054 | [S26] |
| 49 |                                                              |                                                                                                                                        | 2072 | 0.837 | 1  | 296 | 3.92857 | [S27] |
| 50 | ZJNU-42                                                      | 5,5'-(Benzo[c][1,2,5]selenadiazole-4,7-diyl)diisophthalate(H4L3)(Selenadiazole functional group)                                       | 572  | 0.229 | 1  | 298 | 1.67857 | [S26] |
| 51 |                                                              |                                                                                                                                        | 572  | 0.229 | 1  | 288 | 2.00446 |       |
| 52 | QI-Cu                                                        | 2,5-Bis(hydroxymethyl)-3,6-dimethyl-1,4-diisophthalic acid (H4L2)                                                                      | 1631 | 0.662 | 1  | 293 | 4.56    | [S28] |
| 53 | NOTT-101                                                     | 1,1':4',1''-Terphenyl-3,3'',5,5''-tetracarboxylic acid                                                                                 | 2522 | 1.014 | 1  | 293 | 3.93    | [S28] |
| 54 | NJU-Bai14(Cu2NTPTB)                                          | H4NTPTB = 2'-nitro-1,1':4',1''-Terphenyl-3,3'',5,5''-tetracarboxylic acid                                                              | 2384 | 0.924 | 1  | 298 | 4.46429 | [S29] |
| 55 |                                                              |                                                                                                                                        | 2384 | 0.924 | 1  | 273 | 8.34821 |       |
| 56 | MOF-505                                                      | H4BPTC (Biphenyl-3,3',5,5'-tetracarboxylic acid)                                                                                       | 967  | 0.63  | 1  | 298 | 3.25893 | [S4]  |
| 57 | HNUST-1(HNUST = Hunan University of Science and Technology)  | H4BDPT(bis(3,5-dicarboxyphenyl)terephthalamide = H4BDPT)                                                                               | 1400 | 0.571 | 1  | 298 | 4.15179 | [S30] |
| 58 | HNUST-3(=HNUST = Hunan University of Science and Technology) | N,N'-bis(3,5-dicarboxyphenyl)-oxalamide = H4BDPO                                                                                       | 2412 | 0.99  | 1  | 298 | 3.79464 | [S31] |
| 59 | NOTT-125                                                     | H4L=oxalylbis(azanediyl)diisophthalic acid                                                                                             | 2471 | 1.1   | 1  | 298 | 4.13348 | [S32] |
| 60 |                                                              |                                                                                                                                        | 2471 | 1.1   | 1  | 273 | 9.091   |       |
| 61 | NOTT-122                                                     | 5,5',5''-(4,4',4''-(benzene-1,3,5-triyl)tris(1H-1,2,3-triazole-4,1-diyl))triisophthalic acid (H6BTTI)                                  | 3286 | 1.41  | 1  | 273 | 9.02273 | [S33] |
| 62 |                                                              |                                                                                                                                        | 3286 | 1.41  | 1  | 298 | 4.63636 |       |
| 63 | PCN-61                                                       | BTEI=5,5',5''-(benzene-1,3,5-triyl)tris(ethyne-2,1-diyl)triisophthalic acid                                                            | 3350 | 1.37  | 1  | 273 | 4.86364 | [S34] |
| 64 |                                                              |                                                                                                                                        | 3350 | 1.37  | 20 | 298 | 21.4    | [S35] |
| 65 | PCN-66                                                       | NTEI=5,5',5''-(nitrioltris(benzene-4,1-diyl))tris(ethyne-2,1-diyl)triisophthalic acid                                                  | 4000 | 1.63  | 1  | 273 | 5.02273 | [S34] |
| 66 |                                                              |                                                                                                                                        | 4000 | 1.63  | 20 | 298 | 22.1    | [S35] |
| 67 | PCN-68                                                       | PTEI=5,5'-((5'-(4-((3,5-dicarboxyphenyl)ethynyl)phenyl)-[1,1':3',1''-terphenyl]-4,4''-diyl)bis(ethyne-2,1-diyl))diisophthalic acid     | 5109 | 2.13  | 1  | 273 | 5.02273 | [S34] |
| 68 |                                                              |                                                                                                                                        | 5109 | 2.13  | 20 | 298 | 22.1    | [S35] |
| 69 | Cu-TPBTM                                                     | TPBTM(N,N',N''-tris(isophthalyl)-1,3,5-benzenetricarboxamide)or(5,5',5''-[Benzene-1,3,5-triyl]tris(carbonylimino))triisophthalic acid) | 3160 | 1.27  | 20 | 298 | 23.5    | [S35] |
| 70 | Cu-BTB(Cu3(BTB <sup>6-</sup> ))                              | H6BTB                                                                                                                                  | 3288 | 1.77  | 20 | 273 | 35.6818 | [S36] |
| 71 |                                                              |                                                                                                                                        | 3288 | 1.77  | 20 | 298 | 25.2    |       |

|    |                                                  |                                                                                                           |       |       |    |     |         |       |
|----|--------------------------------------------------|-----------------------------------------------------------------------------------------------------------|-------|-------|----|-----|---------|-------|
| 72 | Cu-TBT(Cu <sub>3</sub> (TATB <sup>6-</sup> ))    | H6TBTB(5,5',5''-((4,4',4''-(1,3,5-triazine-2,4,6-triyl)tris(benzoyl))tris(azanediy))triiisophthalic acid) | 3360  | 1.91  | 20 | 273 | 35.6    | [S36] |
| 73 |                                                  |                                                                                                           | 3360  | 1.91  | 20 | 298 | 25.2    |       |
| 74 | MOF-205                                          | 4,4',4''-benzene-1,3,5-triyl-tribenzoic acid (H3BTB)/2,6-naphthalenedicarboxylic acid (NDC)               | 4460  | 2.16  | 50 | 298 | 38.1    | [S9]  |
| 75 |                                                  |                                                                                                           | 4460  | 2.16  | 20 | 273 | 33.9    |       |
| 76 |                                                  |                                                                                                           | 4460  | 2.16  | 20 | 298 | 26      |       |
| 77 | MOF -210                                         | BTE/biphenyl-4,4'-dicarboxylate (BPDC)                                                                    | 6240  | 3.6   | 20 | 273 | 54.5    | [S9]  |
| 78 |                                                  |                                                                                                           | 6240  | 3.6   | 20 | 298 | 16      |       |
| 79 | NJU-Bai3(NJU-Bai3= Nanjing University Bai group) | 5-(4-carboxybenzoylamino)-isophthalic acid (H3L)                                                          | 2690  | 1.08  | 1  | 273 | 6.21    | [S37] |
| 80 |                                                  |                                                                                                           | 2690  | 1.08  | 20 | 273 | 22.12   |       |
| 81 |                                                  |                                                                                                           | 2690  | 1.08  | 20 | 298 | 18.1    |       |
| 82 | PCN-124                                          | 5,5'-((pyridine-3,5-dicarbonyl)bis(azanediy))diisophthalic acid (H4PDAI)                                  | 1372  | 0.579 | 1  | 273 | 6.5     | [S38] |
| 83 |                                                  |                                                                                                           | 1372  | 0.579 | 1  | 283 | 5.40909 |       |
| 84 |                                                  |                                                                                                           | 1372  | 0.579 | 1  | 295 | 4.15909 |       |
| 85 | Cu-TCMBT                                         | N,N',N''-tris(carboxymethyl)-1,3,5-benzenetricarboxamide (TCMBT)&bpp = 1,3-bis(4-pyridyl)propane          | 808.5 | 0.32  | 1  | 298 | 2       | [S39] |
| 86 |                                                  |                                                                                                           | 808.5 | 0.32  | 20 | 298 | 5.5     |       |
| 87 | TMU-6 (TMU = Tarbiat Modares University)         | 4,4''-oxybisbenzoic acid (H2oba)&N,N'-bis-(4-pyridylmethylene)-1,4-benzenediamine (bpmb)                  | 150   | 0.32  | 1  | 203 | 9       | [S40] |
| 88 | TMU-21                                           | 4,4''-oxybisbenzoic acid (H2oba)&N,N'-bis-(4-pyridylmethylene)-1,5-naphthalenediamine (bpm)               | 0     | 0.16  | 1  | 203 | 4.5     | [S40] |
| 89 | TMU-22                                           | 4,4''-oxybisbenzoic acid (H2oba)&N,N'-bis(4-pyridinyl)-terephthalamide (bpta)                             | 680   | 0.25  | 1  | 203 | 7.2     | [S40] |
| 90 | TMU-23                                           | 4,4''-oxybisbenzoic acid (H2oba)& N,N'-(1,4-phenylene)diisonicotinamide (bpf)                             | 0     | 0.27  | 1  | 203 | 7.2     | [S40] |
| 91 | TMU-24                                           | 4,4''-oxybisbenzoic acid (H2oba)& N,N'-bis-(4-pyridylformamide)-1,5-naphthalenediamine (bpfn)             | 0     | 0.22  | 1  | 203 | 6.3     | [S40] |
| 92 | WUF-1                                            | 2-((dimethylcarbamoithioyl)oxy)-[1,1'-biphenyl]-4,4'-dicarboxylic acid, H2L1                              | 1724  | 7.3   | 1  | 273 | 2.18182 | [S41] |
| 93 | WUF-2                                            | 2-((dimethylcarbamoyl)thio)-[1,1'-biphenyl]-4,4'-dicarboxylic acid                                        | 1760  | 7.5   | 1  | 273 | 2.5     | [S41] |
| 94 | Ni(BPB)                                          | H2BPB=1,4-Bis(4-pyrazolyl)benzene                                                                         | 1600  | 0.38  | 30 | 273 | 10      | [S42] |
| 95 | Zn(BPB)                                          | H2BPB=1,4-Bis(4-pyrazolyl)benzene                                                                         | 2200  | 0.71  | 30 | 273 | 9.1     | [S42] |
| 96 | [Fe <sub>2</sub> (BPEB) <sub>3</sub> ]           | 1,4-bis(1H-pyrazol-4-ylethynyl)benzene (H2BPEB)                                                           | 1273  | 0.79  | 10 | 298 | 9.2     | [S42] |
| 97 |                                                  |                                                                                                           | 1273  | 0.79  | 10 | 273 | 12      |       |

|     |                                                                   |                                                                                                    |      |       |     |     |         |       |
|-----|-------------------------------------------------------------------|----------------------------------------------------------------------------------------------------|------|-------|-----|-----|---------|-------|
| 98  |                                                                   |                                                                                                    | 1273 | 0.79  | 1   | 195 | 13.6    |       |
| 99  | [Ni(BPEB)]                                                        | 1,4-bis(1H-pyrazol-4-ylethynyl)benzene (H2BPEB)                                                    | 1900 | 1.05  | 10  | 298 | 5.9     | [S42] |
| 100 |                                                                   |                                                                                                    | 1900 | 1.05  | 10  | 273 | 8.5     |       |
| 101 |                                                                   |                                                                                                    | 1900 | 1.05  | 1   | 195 | 11.6    |       |
| 102 | $\alpha$ -[Zn(BPEB)]                                              | 1,4-bis(1H-pyrazol-4-ylethynyl)benzene (H2BPEB)                                                    | 985  | 0.6   | 10  | 298 | 5.2     | [S42] |
| 103 |                                                                   |                                                                                                    | 985  | 0.6   | 10  | 273 | 8.2     |       |
| 104 |                                                                   |                                                                                                    | 985  | 0.6   | 1   | 195 | 11.3    |       |
| 105 | DMOF(Zn <sub>2</sub> (BDC) <sub>2</sub> (DABCO))                  | BDC = 1,4-benzenedicarboxylate, DABCO = diazabicyclo-octane                                        | 1980 | 0.76  | 20  | 298 | 8.65909 | [S43] |
| 106 | DMOF-Br                                                           | (BDC-Br)(DABCO)                                                                                    | 1320 | 0.53  | 20  | 298 | 5.52273 | [S43] |
| 107 | DMOF-NO <sub>2</sub>                                              | (BDC-NO <sub>2</sub> )(DABCO)                                                                      | 1310 | 0.53  | 20  | 298 | 7.27273 | [S43] |
| 108 | DMOF-TF                                                           | (BDC-TF)(DABCO)                                                                                    | 1210 | 0.49  | 20  | 298 | 3.68182 | [S43] |
| 109 | DMOF-Cl <sub>2</sub>                                              | (BDC-Cl <sub>2</sub> )(DABCO)                                                                      | 1180 | 0.45  | 20  | 298 | 6       | [S43] |
| 110 | DMOF-OH                                                           | (BDC-OH)(DABCO)                                                                                    | 1130 | 0.54  | 20  | 298 | 5.63636 | [S43] |
| 111 | DMOF-DM                                                           | (BDC-DM)(DABCO)                                                                                    | 1120 | 0.48  | 20  | 298 | 5.77273 | [S43] |
| 112 | DMOF-TM                                                           | (BDC-TM)(DABCO).                                                                                   | 1050 | 0.57  | 20  | 298 | 5.36364 | [S43] |
| 113 | DMOF-A                                                            | (BDC-A)(DABCO)                                                                                     | 760  | 0.33  | 20  | 298 | 3.88636 | [S43] |
| 114 | UiO-66(Zr100)                                                     | TPA= BDC= Terephthalic acid                                                                        | 1390 | 0.7   | 1   | 298 | 1.40909 | [S44] |
| 115 | UiO-66(Ti56)                                                      | TPA= BDC= Terephthalic acid                                                                        | 1844 | 1.18  | 1   | 298 | 2       | [S44] |
| 116 | (MgMOF-74)                                                        | dobdc <sup>4-</sup> = 2,5-dioxido-1,4-benzenedicarboxylate=2,5-Dioxidoterephthalate                | 1495 | 0.572 | 0.1 | 296 | 5.36364 | [S3]  |
| 117 |                                                                   |                                                                                                    | 1495 | 0.572 | 1   | 296 | 8       |       |
| 118 | Ni-MOF-74                                                         | dobdc <sup>4-</sup> = 2,5-dioxido-1,4-benzenedicarboxylate=2,5-Dioxidoterephthalate                | 1070 | 0.54  | 0.1 | 296 | 2.63636 | [S3]  |
| 119 |                                                                   |                                                                                                    | 1070 | 0.54  | 1   | 296 | 5.81818 |       |
| 120 | Co-MOF-74                                                         | dobdc <sup>4-</sup> = 2,5-dioxido-1,4-benzenedicarboxylate=2,5-Dioxidoterephthalate                | 1080 | 0.5   | 0.1 | 296 | 2.63636 | [S3]  |
| 121 |                                                                   |                                                                                                    | 1080 | 0.5   | 1   | 296 | 6.95455 |       |
| 122 | Zn-MOF-74                                                         | dobdc <sup>4-</sup> = 2,5-dioxido-1,4-benzenedicarboxylate=2,5-Dioxidoterephthalate                | 816  | 0.58  | 0.1 | 296 | 1.31818 | [S3]  |
| 123 |                                                                   |                                                                                                    | 816  | 0.58  | 1   | 296 | 5.54545 |       |
| 124 | CPM-33a [Ni <sub>3</sub> OH(bdc) <sub>3</sub> tpt]                | (bdc=Terephthalic acid )&(tpt=2,4,6-tri(4-pyridinyl)-1,3,5-triazine)                               | 966  | 0.463 | 0.1 | 273 | 0.73    | [S45] |
| 125 |                                                                   |                                                                                                    | 966  | 0.463 | 0.1 | 298 | 0.35    |       |
| 126 |                                                                   |                                                                                                    | 966  | 0.463 | 1   | 273 | 6.09    |       |
| 127 |                                                                   |                                                                                                    | 966  | 0.463 | 1   | 298 | 3.29    |       |
| 128 | CPM-33b[Ni <sub>3</sub> OH(dhbdc) <sub>3</sub> tpt]               | (dhbdc=2,5-dihydroxybenzene-1,4-dicarboxylate)&(tpt=2,4,6-tri(4-pyridinyl)-1,3,5-triazine)         | 808  | 0.399 | 0.1 | 273 | 2.42    | [S45] |
| 129 |                                                                   |                                                                                                    | 808  | 0.399 | 0.1 | 298 | 1.03    |       |
| 130 |                                                                   |                                                                                                    | 808  | 0.399 | 1   | 273 | 7.76    |       |
| 131 |                                                                   |                                                                                                    | 808  | 0.399 | 1   | 298 | 5.63    |       |
| 132 | CPM-33c[Ni <sub>3</sub> OH(NH <sub>2</sub> bdc) <sub>3</sub> tpt] | (NH <sub>2</sub> bdc=2-aminobenzene-1,4-dicarboxylate)&(tpt=2,4,6-tri(4-pyridinyl)-1,3,5-triazine) | 805  | 0.409 | 0.1 | 273 | 1.15    | [S45] |
| 133 |                                                                   |                                                                                                    | 805  | 0.409 | 0.1 | 298 | 0.59    |       |
| 134 |                                                                   |                                                                                                    | 805  | 0.409 | 1   | 273 | 5.99    |       |

|     |                                                                           |                                                                                            |      |       |      |     |         |       |
|-----|---------------------------------------------------------------------------|--------------------------------------------------------------------------------------------|------|-------|------|-----|---------|-------|
| 135 |                                                                           |                                                                                            | 805  | 0.409 | 1    | 298 | 3.95    |       |
| 136 | CPM-33d[Ni3OH(1,4-ndc)3tpt]                                               | (1,4-ndc=naphthalene-1,4-dicarboxylate)&(tpt=2,4,6-tri(4-pyridinyl)-1,3,5-triazine)        | 222  | 0.106 | 0.1  | 273 | 0.45    | [S45] |
| 137 |                                                                           |                                                                                            | 222  | 0.106 | 0.1  | 298 | 0.22    |       |
| 138 |                                                                           |                                                                                            | 222  | 0.106 | 1    | 273 | 1.62    |       |
| 139 |                                                                           |                                                                                            | 222  | 0.106 | 1    | 298 | 1.1     |       |
| 140 | CPM-34[Ni3OH(2,6-ndc)3tpt]                                                | (2,6-ndc=naphthalene-2,6-dicarboxylate)&(tpt=2,4,6-tri(4-pyridinyl)-1,3,5-triazine)        | 1002 | 0.487 | 0.1  | 273 | 0.45    | [S45] |
| 141 |                                                                           |                                                                                            | 1002 | 0.487 | 0.1  | 298 | 0.23    |       |
| 142 |                                                                           |                                                                                            | 1002 | 0.487 | 1    | 273 | 3.13    |       |
| 143 |                                                                           |                                                                                            | 1002 | 0.487 | 1    | 298 | 1.96    |       |
| 144 | CPM-35[Ni3OH(bpdc)3tpt]                                                   | (bpdc=biphenyl-4,4'-dicarboxylate)&(tpt=2,4,6-tri(4-pyridinyl)-1,3,5-triazine)             | 724  | 0.311 | 0.1  | 273 | 0.35    | [S45] |
| 145 |                                                                           |                                                                                            | 724  | 0.311 | 0.1  | 298 | 0.21    |       |
| 146 |                                                                           |                                                                                            | 724  | 0.311 | 1    | 273 | 1.93    |       |
| 147 |                                                                           |                                                                                            | 724  | 0.311 | 1    | 298 | 1.32    |       |
| 148 | Fe2Ni-MIL-88B•Bp                                                          | BDC(1,4-benzenedicarboxylate)&4,4'-bipyridine (Bp)                                         | 1120 | 0.448 | 1    | 273 | 4.50893 | [S46] |
| 149 | Fe2Ni-MIL-88B•Pz                                                          | BDC(1,4-benzenedicarboxylate)&pyrazine (Pz)                                                | 465  | 0.186 | 1    | 273 | 2.41071 | [S46] |
| 150 | mmen-CuBTTri                                                              | (H3BTTri = 1,3,5-tri(1H-1,2,3-triazol-4-yl)-benzene)&(mmen = N,N'-dimethylethylenediamine) | 870  | 0.363 | 1    | 298 | 4.13636 | [S47] |
| 151 |                                                                           |                                                                                            | 870  | 0.363 | 0.15 | 298 | 2.39    |       |
| 152 | CuBTTri                                                                   | H3BTTri = 1,3,5-tri(1H-1,2,3-triazol-4-yl)-benzene)                                        | 1770 | 0.712 | 1    | 298 | 3.79545 | [S48] |
| 153 |                                                                           |                                                                                            | 1770 | 0.712 | 0.15 | 298 | 0.68    |       |
| 154 | UTSA-16 (K(H2O)2Co3(cit)(Hcit)) (UTSA=University of Texas at San Antonio) | H4cit=citric acid                                                                          | 628  | 0.31  | 1    | 298 | 4.29545 | [S2]  |
| 155 | UTSA-20[Cu3(BHB)]                                                         | H6BHB=3,3',3'',5,5',5''-benzene-1,3,5-triylhexabenzic acid                                 | 1156 | 0.635 | 1    | 298 | 3.33    | [S49] |
| 156 |                                                                           |                                                                                            | 1156 | 0.635 | 0.15 | 300 | 0.575   |       |
| 157 | UTSA-25a [Zn(BDC-OH)(DABCO)0.5·(DMF)2(H2O)]                               | [H2BDC-OH = 2-hydroxybenzenedicarboxylic acid]&[DABCO = 1,4-diazabicyclo[2.2.2]octane]     | 994  | 0.607 | 1    | 298 | 3.11    | [S50] |
| 158 | UTSA-34b                                                                  | H8L=1,2,4,5-tetra(5-isophthalate)benzene                                                   | 991  | 0.542 | 1    | 298 | 2.88    | [S51] |
| 159 | UTSA-33a                                                                  | H8L=1,2,4,5-tetra(5-isophthalate)benzene                                                   | 660  | 0.367 | 1    | 298 | 2.37    | [S51] |
| 160 | UTSA-15a [Cu(BDC-OH)(4,4'-bipy)]                                          | (H2BDC-OH = 2-hydroxy-benzenedicarboxylic acid)&(4,4'-bipy = 4,4'-bipyridine)              | 553  | 0.282 | 1    | 298 | 1.36    | [S52] |
| 161 | Zn4(OH)2(1,2,4-                                                           | 1,2,4-BTC = Benzene-1,2,4-tricarboxylate =                                                 | 408  | 0.216 | 1    | 298 | 1.75    | [S22] |

|     |                                               |                                                                                   |      |        |      |     |         |       |
|-----|-----------------------------------------------|-----------------------------------------------------------------------------------|------|--------|------|-----|---------|-------|
| 162 | BTC)2                                         | Trimellitic acid                                                                  | 408  | 0.216  | 0.15 | 295 | 0.31    | [S22] |
| 163 | Zn5(BTA)6(TDA)2                               | HBTA = 1,2,3-benzenetriazole&H2TDA = thiophene-2,5-dicarboxylic acid              | 414  | 0.225  | 1    | 298 | 1.55    | [S53] |
| 164 | Cu(BDC-OH)                                    | H2BDC-OH = 2-hydroxy-benzenedicarboxylic acid                                     | 397  | 0.214  | 1    | 298 | 2.21    | [S54] |
| 165 | Yb(BPT)=MOF 1                                 | BPT = biphenyl-3,4',5-tricarboxylate                                              | 516  | 0.291  | 1    | 298 | 0.7     | [S55] |
| 166 | Bio-MOF-11<br>[Co2(ad)2(CO2CH3)2·2DMF·0.5H2O] | adenine&CH3CO2H                                                                   | 1040 | 0.45   | 1    | 298 | 1.28    | [S56] |
| 167 | Zn(bdc)(dabco)0.5                             | BDC = 1,4-benzyl dicarboxylate&DABCO = diazabicyclo-octane                        | 2022 | 0.8    | 1    | 298 | 2.04    | [S2]  |
| 168 | Cu-TDPAT                                      | 2,4,6-tris(3,5-dicarboxyphenylamino)-1,3,5-triazine=H6TDPAT                       | 1038 | 0.93   | 1    | 298 | 5.09    | [S2]  |
| 169 | CPM-5(CPM =crystalline porous materials)      | BTC = 1,3,5-benzenetricarboxylate                                                 | 580  | 0.258  | 1    | 273 | 3.62946 | [S35] |
| 170 | (((CH3)2NH2][In3O(BTC)2(H2O)3]2)              |                                                                                   | 580  | 0.258  | 1    | 298 | 2.43304 |       |
| 171 | PCN-6                                         | H3TATB=4,4',4''-s-triazine-2,4,6-triyl-tribenzoic acid                            | 3811 | 1.55   | 1    | 298 | 4.29545 | [S57] |
| 172 | IRMOF-9                                       | BPDC= 4,4'-biphenyldicarboxylic acid                                              | 1918 | 1.18   | 1    | 298 | 1.79    | [S58] |
| 173 | Zn-DABCO                                      | terephthalic acid=BDC=1,4-benzene dicarboxylate & DABCO = 1,4-diazabicyclo[2.2.2] | 1870 | 1.67   | 1    | 298 | 1.87    | [S59] |
| 174 | Ni-DABCO                                      | terephthalic acid=BDC=1,4-benzene dicarboxylate & DABCO = 1,4-diazabicyclo[2.2.2] | 2120 | 1.78   | 1    | 298 | 2.17    | [S59] |
| 175 | Cu-DABCO                                      | terephthalic acid=BDC=1,4-benzene dicarboxylate & DABCO = 1,4-diazabicyclo[2.2.2] | 1616 | 1.67   | 1    | 298 | 1.45    | [S59] |
| 176 | Co-DABCO                                      | terephthalic acid=BDC=1,4-benzene dicarboxylate & DABCO = 1,4-diazabicyclo[2.2.2] | 2022 | 1.64   | 1    | 298 | 1.02    | [S59] |
| 177 | UTSA-62a<br>[Yb3O(H2O)3(L)(NO3)]              | H6L                                                                               | 2190 | 0.9077 | 1    | 298 | 1.84091 | [S60] |
| 178 | UTSA-40a                                      | H4L=5,5'-(6,6'-dichloro-2,2'-diethoxy-[1,1'-                                      | 1630 | 0.65   | 30   | 300 | 12.7    | [S61] |



|     |                                                 |                                                                                            |       |       |      |     |         |       |
|-----|-------------------------------------------------|--------------------------------------------------------------------------------------------|-------|-------|------|-----|---------|-------|
|     |                                                 | binaphthalene]-4,4'-diyl)diisophthalic acid                                                |       |       |      |     |         |       |
| 179 | PCN-46                                          | H4L=5,5'-(buta-1,3-diyne-1,4-diyl)diisophthalic acid                                       | 2500  | 1.02  | 30   | 298 | 22.5    | [S62] |
| 180 | SNU-50                                          | H4L=5,5'-(1,3,5,7-tetraoxopyrrolo[3,4-f]isoindole-2,6(1H,3H,5H,7H)-diyl)diisophthalic acid | 2300  | 1.08  | 55   | 298 | 17.5    | [S63] |
| 181 |                                                 |                                                                                            | 2300  | 1.08  | 1    | 298 | 3.6     |       |
| 182 |                                                 |                                                                                            | 2300  | 1.08  | 0.15 | 298 | 0.65    |       |
| 183 | NU-111                                          | H6L=5,5',5''-(benzene-1,3,5-triyltris(buta-1,3-diyne-4,1-diyl))triisophthalic acid         | 4932  | 2.09  | 1    | 298 | 1.09091 | [S64] |
| 184 | UTSA-49=[Zn(mtz)2]                              | Hmtz = 5-methyl-1H-tetrazole                                                               | 710.5 | 0.407 | 1    | 298 | 3.09091 | [S65] |
| 185 | IRMOF-8                                         | 2,6-naphthalenedicarboxylic acid = 2,6-H2NDC                                               | 1599  | 0.66  | 1    | 298 | 1.77273 | [S66] |
| 186 |                                                 |                                                                                            | 1599  | 0.66  | 30   | 273 | 14.4    |       |
| 187 |                                                 |                                                                                            | 1599  | 0.66  | 30   | 298 | 11.7    |       |
| 188 | IRMOF-8-NO2                                     | 4,8-dinitro-2,6-naphthalenedicarboxylic acid                                               | 832   | 0.341 | 1    | 298 | 0.86364 | [S66] |
| 189 |                                                 |                                                                                            | 832   | 0.341 | 1    | 273 | 11      |       |
| 190 |                                                 |                                                                                            | 832   | 0.341 | 1    | 298 | 7.2     |       |
| 191 | ZJU-32                                          | H4L = 5'-((3,5-dicarboxyphenyl)ethynyl)-[1,1':3',1''-terphenyl]-4,4''-dicarboxylic acid    | 3831  | 1.482 | 1    | 300 | 1.91    | [S67] |
| 192 |                                                 |                                                                                            | 3831  | 1.482 | 40   | 300 | 11.1364 |       |
| 193 | rht-MOF-1                                       | 5-(2H-tetrazol-5-yl)isophthalic acid                                                       | 2847  | 1.01  | 1    | 298 | 2.5     | [S68] |
| 194 | Cu2dbip                                         | 5-(3,5-dicarboxybenzyloxy)isophthalic acid (H4DBIP)                                        | 1773  | 0.81  | 1    | 298 | 5.44643 | [S69] |
| 195 | ZJU-25[Cu2(FDDI)]<br>ZJU = Zhejiang University) | H4FDDI = tetramethyl 5,5'-(9H-fluorene-2,7-diyl)diisophthalate acid                        | 2124  | 1.183 | 1    | 298 | 3.70536 | [S70] |
| 196 | ZJU-5                                           | H4PDDI = 5,5'-(pyridine-2,5-diyl)diisophthalic acid)                                       | 2823  | 1.074 | 1    | 298 | 3.79464 | [S71] |
| 197 | CPM(200)-In                                     | Trimesic acid(TMA, H3BTC, BTC)                                                             | 888   | 0.44  | 1    | 298 | 2.75446 | [S72] |
| 198 |                                                 |                                                                                            | 888   | 0.44  | 1    | 273 | 4.89286 |       |
| 199 | CPM(200)-In/Ni                                  | Trimesic acid(TMA, H3BTC, BTC)                                                             | 877   | 0.43  | 1    | 298 | 2.74554 | [S72] |
| 200 |                                                 |                                                                                            | 877   | 0.43  | 1    | 273 | 4.48214 |       |
| 201 | CPM(200)-In/Co                                  | Trimesic acid(TMA, H3BTC, BTC)                                                             | 1040  | 0.51  | 1    | 298 | 3.46429 | [S72] |
| 202 |                                                 |                                                                                            | 1040  | 0.51  | 1    | 273 | 6.11161 |       |
| 203 | CPM(200)-In/Mn                                  | Trimesic acid(TMA, H3BTC, BTC)                                                             | 941   | 0.45  | 1    | 298 | 3.24554 | [S72] |
| 204 |                                                 |                                                                                            | 941   | 0.45  | 1    | 273 | 5.64732 |       |
| 205 | CPM(200)-In/Mg                                  | Trimesic acid(TMA, H3BTC, BTC)                                                             | 1347  | 0.65  | 1    | 298 | 5.07589 | [S72] |
| 206 |                                                 |                                                                                            | 1347  | 0.65  | 1    | 273 | 8.51786 |       |
| 207 | CPM(200)-Ga/Mg                                  | Trimesic acid(TMA, H3BTC, BTC)                                                             | 1056  | 0.54  | 1    | 298 | 3.53571 | [S72] |
| 208 |                                                 |                                                                                            | 1056  | 0.54  | 1    | 273 | 6.08036 |       |

|     |                               |                                                                                                             |      |       |    |     |         |       |
|-----|-------------------------------|-------------------------------------------------------------------------------------------------------------|------|-------|----|-----|---------|-------|
| 209 | CPM(200)-Fe/Mg                | Trimesic acid(TMA, H3BTC, BTC)                                                                              | 1459 | 0.72  | 1  | 273 | 9.26786 | [S72] |
| 210 |                               |                                                                                                             | 1459 | 0.72  | 1  | 298 | 5.68304 |       |
| 211 | CPM(200)-V/Mg                 | Trimesic acid(TMA, H3BTC, BTC)                                                                              | 1011 | 0.5   | 1  | 273 | 6.9375  | [S72] |
| 212 |                               |                                                                                                             | 1011 | 0.5   | 1  | 298 | 3.58929 |       |
| 213 | CPM(200)-Sc/Mg                | Trimesic acid(TMA, H3BTC, BTC)                                                                              | 1041 | 0.51  | 1  | 298 | 2.74107 | [S72] |
| 214 |                               |                                                                                                             | 1041 | 0.51  | 1  | 273 | 5.46429 |       |
| 215 | CPM-20                        | Trimesic acid(TMA, H3BTC, BTC)&1,4-Benzenedicarboxylic acid                                                 | 1009 | 0.404 | 1  | 298 | 2.13    | [S73] |
| 216 |                               |                                                                                                             | 1009 | 0.404 | 1  | 273 | 4.07    |       |
| 217 | CPM-21                        | BTB=1,3,5-tri(4-carboxyphenyl)benzene                                                                       | 272  | 0.133 | 1  | 273 | 1.71    | [S73] |
| 218 | CPM-13                        | 4,4'-biphenyl-dicarboxylic acid                                                                             | 904  | 0.487 | 1  | 273 | 2.03    | [S74] |
| 219 | IRMOF-74-III-CH3              | H4DH3PhDC-CH3 H4DH3PhDC = 2',5'-dimethyl-3,3"-dihydroxy-[1,1':4',1"-terphenyl]-4,4"-dicarboxylic acid       | 2640 | 1.37  | 1  | 298 | 2.95089 | [S75] |
| 220 | IRMOF-74-III-NH2              | H4DH3PhDC-NH2 H4DH3PhDC = 2',5'-dimethyl-3,3"-dihydroxy-[1,1':4',1"-terphenyl]-4,4"-dicarboxylic acid       | 2720 | 1.44  | 1  | 298 | 3.16964 | [S75] |
| 221 | IRMOF-74-III-CH2NHBoc         | H4DH3PhDC-CH2NHBoc H4DH3PhDC = 2',5'-dimethyl-3,3"-dihydroxy-[1,1':4',1"-terphenyl]-4,4"-dicarboxylic acid  | 2170 | 0.95  | 1  | 298 | 2.08482 | [S75] |
| 222 | IRMOF-74-III-CH2NH2           | H4DH3PhDC-CH2NH2 H4DH3PhDC = 2',5'-dimethyl-3,3"-dihydroxy-[1,1':4',1"-terphenyl]-4,4"-dicarboxylic acid    | 2310 | 1.14  | 1  | 298 | 3.26786 | [S75] |
| 223 | IRMOF-74-III-CH2NMeBoc        | H4DH3PhDC-CH2NMeBoc H4DH3PhDC = 2',5'-dimethyl-3,3"-dihydroxy-[1,1':4',1"-terphenyl]-4,4"-dicarboxylic acid | 2220 | 0.89  | 1  | 298 | 1.90625 | [S75] |
| 224 | IRMOF-74-III-CH2NHMe          | H4DH3PhDC-CH2NHMe H4DH3PhDC = 2',5'-dimethyl-3,3"-dihydroxy-[1,1':4',1"-terphenyl]-4,4"-dicarboxylic acid   | 2250 | 1.13  | 1  | 298 | 2.85268 | [S75] |
| 225 | MIL-53<br>(Al)(Basolite A100) | TPA, H2BDC, Terephthalic acid                                                                               | 1500 | 0.581 | 25 | 298 | 6.8     | [S12] |
| 226 |                               |                                                                                                             | 1500 | 0.581 | 30 | 304 | 10.4    | [S6]  |
| 227 |                               |                                                                                                             | 1500 | 0.581 | 1  | 318 | 1       | [S76] |
| 228 | UPG-1                         | H6ttbmp=2,4,6-tris(4-phosphonomethyl)phenyl)-1,3,5-triazine                                                 | 410  | 0.2   | 10 | 273 | 3.39286 | [S77] |
| 229 |                               |                                                                                                             | 410  | 0.2   | 10 | 298 | 3.08036 |       |
| 230 | Bio-MOF-11                    | adenine&CH3CO2H                                                                                             | 1040 | 0.45  | 1  | 273 | 6.56    | [S78] |
| 231 |                               |                                                                                                             | 1040 | 0.45  | 1  | 298 | 4.06    | [S56] |
| 232 | Bio-MOF-12                    | adenine&C2H5CO2H                                                                                            | 1008 | 0.42  | 1  | 273 | 4.46    | [S78] |
| 233 |                               |                                                                                                             | 1008 | 0.42  | 1  | 298 | 3.17    |       |

|     |                                                         |                                                                          |       |       |      |     |        |       |
|-----|---------------------------------------------------------|--------------------------------------------------------------------------|-------|-------|------|-----|--------|-------|
| 234 | Bio-MOF-13                                              | adenine&C3H7CO2H                                                         | 412   | 0.2   | 1    | 273 | 2.68   | [S78] |
| 235 |                                                         |                                                                          | 412   | 0.2   | 1    | 298 | 2.01   |       |
| 236 | Bio-MOF-14                                              | adenine&C4H9CO2H                                                         | 17    | 0.035 | 1    | 273 | 2.01   | [S78] |
| 237 |                                                         |                                                                          | 17    | 0.035 | 1    | 298 | 1.38   |       |
| 238 | ZnAcBPDC                                                | 2,2'-diacetamido-[1,1'-biphenyl]-4,4'-dicarboxylic acid                  | 920   | 0.5   | 0.9  | 273 | 4.65   | [S79] |
| 239 |                                                         |                                                                          | 920   | 0.5   | 0.9  | 293 | 2.91   |       |
| 240 |                                                         |                                                                          | 920   | 0.5   | 0.9  | 313 | 2.06   |       |
| 241 | ZnBuBPDC                                                | 2,2'-dibutyramido-[1,1'-biphenyl]-4,4'-dicarboxylic acid                 | 850   | 0.43  | 0.9  | 293 | 1.73   |       |
| 242 | PCN-26                                                  | tetrakis[(3,5-dicarboxyphenyl)oxamethyl]methane=H8TDM                    | 1854  | 0.84  | 1    | 298 | 4.6875 | [S80] |
| 243 | MSO2Me-100                                              | H2L2 = 2-((methylsulfonyl)methyl)-[1,1'-biphenyl]-4,4'-dicarboxylic acid | 1776  | 0.78  | 1    | 196 | 18.5   | [S81] |
| 244 |                                                         |                                                                          | 1776  | 0.78  | 1    | 298 | 1.4    |       |
| 245 |                                                         |                                                                          | 1776  | 0.78  | 10   | 298 | 6.5    |       |
| 246 | MSO2Pr-100(WUF-10) WUF= Wollongong University Framework | H2L4=2-((propylsulfonyl)methyl)-[1,1'-biphenyl]-4,4'-dicarboxylic acid   | 1514  | 0.65  | 1    | 196 | 15.5   | [S81] |
| 247 |                                                         |                                                                          | 1514  | 0.65  | 1    | 298 | 0.98   |       |
| 248 |                                                         |                                                                          | 1514  | 0.65  | 10   | 298 | 6      |       |
| 249 | MIL-140A                                                | H2bdc= terephthalic acid=benzene-1,4-dicarboxylic acid                   | 396.4 | 0.16  | 0.15 | 293 | 0.16   | [S82] |
| 250 | MIL-140A-NH2                                            | H2bdc-NH2= 2-aminobenzene-1,4-dicarboxylic acid                          | 269.3 | 0.14  | 0.15 | 293 | 0.28   | [S82] |
| 251 | MIL-140A-F                                              | H2bdc-F= 2-fluoroterephthalic acid                                       | 350.3 | 0.16  | 0.15 | 293 | 0.1    | [S82] |
| 252 | MIL-140B                                                | H2ndc= 2,6- Naphthalenedicarboxylic acid                                 | 429.1 | 0.19  | 0.15 | 293 | 0.17   | [S82] |
| 253 | MIL-140C                                                | H2bpc= biphenyl-4,4'-dicarboxylic acid                                   | 660.8 | 0.27  | 0.15 | 293 | 0.18   | [S82] |
| 254 | MIL-140C-Me                                             | 2,2'-dimethyl-[1,1'-biphenyl]-4,4'-dicarboxylic acid                     | 574.4 | 0.26  | 0.15 | 293 | 0.21   | [S82] |
| 255 | MIL-140D                                                | H2azobdc-Cl =4,4'-(diazene-1,2-diyl)bis(2-chlorobenzoic acid)            | 830.6 | 0.37  | 0.15 | 293 | 0.1    | [S82] |
| 256 | [Cd2L7(H2O)]2                                           | 4,4'-(hexafluoroisopropylidene)diphthalate                               | 147   | 0.1   | 1    | 298 | 2.11   | [S83] |
| 257 | SNU-5                                                   | abtc = 1,1'-azobenzene-3,3',5,5'-tetracarboxylic acid                    | 2850  | 1     | 1    | 273 | 8.75   | [S84] |
| 258 |                                                         |                                                                          | 2850  | 1     | 0.15 | 273 | 1.83   |       |
| 259 | SNU-30'                                                 | TCPBDA = N,N,N',N'-tetrakis(4-carboxyphenyl)-biphenyl-4,4'-diamine       | 704   | 0.28  | 1    | 298 | 1.16   | [S85] |
| 260 |                                                         |                                                                          | 704   | 0.28  | 0.15 | 298 | 0.21   |       |

**Table S2.** Quasi-SMILES of MOFs, the set of each data, DCW, their experimental and predicted log (CO<sub>2</sub> uptake) for three splits

| No. | Quasi-SMILES | Log (CO <sub>2</sub> ) | Set | DCW (T*, N*) | Predicted log (CO <sub>2</sub> uptake) |
|-----|--------------|------------------------|-----|--------------|----------------------------------------|
|-----|--------------|------------------------|-----|--------------|----------------------------------------|

|    |                                                                                                               | uptake) | 1       | 2 | 3 | Split 1 | Split 2 | Split 3 | Split 1 | Split 2 | Split 3 |
|----|---------------------------------------------------------------------------------------------------------------|---------|---------|---|---|---------|---------|---------|---------|---------|---------|
| 1  | [Cu]c1c(cc(cc1C(=O)O)C(=O)O)C(=O)O%12%20%30%49                                                                | -0.07   | Outlier |   |   |         |         |         |         |         |         |
| 2  | [Cu]c1c(cc(cc1C(=O)O)C(=O)O)C(=O)O%12%20%30%49                                                                | 0.72    | *       | # | - | 4.856   | 14.695  | -0.776  | 0.46    | 0.50    | 0.40    |
| 3  | [Cu]c1c(cc(cc1C(=O)O)C(=O)O)C(=O)O%12%20%30%49                                                                | 0.46    | +       | # | + | 4.856   | 14.695  | -0.776  | 0.46    | 0.50    | 0.40    |
| 4  | [Zn]c1cc(ccc1C(=O)O)C(=O)O%14%21%36%49                                                                        | 1.34    | -       | - | * | 23.368  | 34.602  | 14.909  | 1.19    | 1.24    | 1.12    |
| 5  | [Zn]c1cc(c(cc1C(=O)O)N)C(=O)O%12%21%36%49                                                                     | 1.27    | +       | + | * | 23.857  | 37.073  | 14.428  | 1.21    | 1.33    | 1.10    |
| 6  | [Zn]c1cc(c(cc1C(=O)O)N)C(=O)O%12%21%30%49                                                                     | 0.05    | +       | + | + | 5.072   | 14.964  | -0.728  | 0.47    | 0.51    | 0.40    |
| 7  | [V]c1cc(ccc1C(=O)O)C(=O)O%11%20%33%49                                                                         | 1.06    | +       | + | + | 16.729  | 27.006  | 9.187   | 0.93    | 0.95    | 0.86    |
| 8  | [Cr]c1cc(ccc1C(=O)O)C(=O)O%12%20%34%49                                                                        | 1.00    | -       | # | * | 16.577  | 28.225  | 20.146  | 0.92    | 1.00    | 1.36    |
| 9  | [Cr]c1c(cc(cc1C(=O)O)C(=O)O)C(=O)O%13%21%39%49                                                                | 1.26    | *       | - | - | 28.072  | 40.914  | 16.611  | 1.38    | 1.47    | 1.20    |
| 10 | [Fe]c1c(cc(cc1C(=O)O)C(=O)O)C(=O)O%13%21%30%49                                                                | 0.18    | -       | * | + | 3.911   | 12.670  | 0.158   | 0.42    | 0.42    | 0.44    |
| 11 | [Cr]c1cc(ccc1C(=O)O)C(=O)O%14%22%39%49                                                                        | 1.60    | +       | - | - | 32.065  | 36.919  | 17.098  | 1.53    | 1.32    | 1.22    |
| 12 | [Cr]c1cc(ccc1C(=O)O)C(=O)O%14%22%30%49                                                                        | 0.33    | +       | + | - | 5.575   | 14.756  | 6.385   | 0.49    | 0.50    | 0.73    |
| 13 | [Mg]c1c(c(cc(c1O)C(=O)O)O)C(=O)O%11%20%36%49                                                                  | 1.02    | #       | * | + | 21.908  | 34.250  | 18.446  | 1.13    | 1.22    | 1.29    |
| 14 | [Mg]c1c(c(cc(c1O)C(=O)O)O)C(=O)O%11%20%30%49                                                                  | 0.93    | -       | + | + | 5.632   | 17.864  | 0.988   | 0.49    | 0.61    | 0.48    |
| 15 | [Mg]c1c(c(cc(c1O)C(=O)O)O)C(=O)O%11%20%30%49                                                                  | 0.79    | *       | - | * | 5.632   | 17.864  | 0.988   | 0.49    | 0.61    | 0.48    |
| 16 | [Zn]C1=CC(=CC=C1C2=CC(=CC(=C2)C3=CC=C(C=C3)C(=O)O)C4=CC=C(C=C4)C(=O)O)C(=O)O%17%22%33%49                      | 1.45    | -       | - | # | 15.483  | 31.867  | 18.557  | 0.88    | 1.13    | 1.29    |
| 17 | [Zn]C1=CC(=CC=C1C2=CC(=CC(=C2)C3=CC=C(C=C3)C(=O)O)C4=CC=C(C=C4)C(=O)O)C(=O)O%17%22%33%49                      | 1.53    | *       | * | - | 15.483  | 31.867  | 18.557  | 0.88    | 1.13    | 1.29    |
| 18 | [Zn]c1cc(ccc1c2ccc(cc2)C(=O)O)c3cc(cc(c3)c4ccc(cc4)c5cc(c(cc5)C(=O)O)c6ccc(cc6)c7ccc(cc7)C(=O)O)O%17%24%39%49 | 1.74    | *       | * | - | 36.922  | 57.071  | 23.868  | 1.72    | 2.07    | 1.54    |

|    |                                                                                                                                                                           |       |         |   |   |        |        |         |      |      |       |
|----|---------------------------------------------------------------------------------------------------------------------------------------------------------------------------|-------|---------|---|---|--------|--------|---------|------|------|-------|
| 19 | [Zn]c1cc(ccc1c2ccc(cc2)C(=O)O)c3cc(cc(c3)c4ccc(cc4)c5cc(c(cc5)C(=O)O)c6ccc(cc6)c7ccc(cc7)C(=O)O)%17%24%33%49                                                              | 1.74  | -       | # | - | 28.148 | 38.647 | 23.024  | 1.38 | 1.39 | 1.50  |
| 20 | [Zn]c1cc(ccc1c2ccc(cc2)C(=O)O)c3cc(cc(c3)c4ccc(cc4)c5cc(c(cc5)C(=O)O)c6ccc(cc6)c7ccc(cc7)C(=O)O)%17%24%33%49                                                              | 1.17  | -       | + | + | 28.148 | 38.647 | 23.024  | 1.38 | 1.39 | 1.50  |
| 21 | [Zn]c1cc(ccc1c2ccc(cc2)C(=O)O)C(=O)O%19%24%39%49                                                                                                                          | 1.74  | +       | + | - | 32.401 | 39.709 | 8.725   | 1.55 | 1.43 | 0.84  |
| 22 | [Cu]c1c(cc(cc1C(=O)O)C(=O)O)c2cc(cc(c2)C(=O)O)C(=O)O%12%20%36%49                                                                                                          | 1.01  | -       | # | * | 20.239 | 38.172 | 20.907  | 1.07 | 1.37 | 1.40  |
| 23 | [Cu]OC(C1=CC(C(O)=O)=CC(C#CC(C=C2)=CC=C2C#CC3=CC(C#CC4=CC=C(C#CC5=CC(C(O)=O)=CC(C(O)=O)=C5)C=C4)=CC(C#CC6=CC=C(C#CC7=CC(C(O)=O)=CC(C(O)=O)=C7)C=C6)=C3)=C1)=O%19%23%37%49 | 1.67  | +       | - | * | 40.148 | 42.949 | 27.095  | 1.85 | 1.55 | 1.68  |
| 24 | [Zn]C1=CC(=CC=C1C2=CC(=CC(=C2)C3=CC=C(C=C3)C(=O)O)C4=CC=C(C=C4)C(=O)O)C(=O)O%16%22%34%49                                                                                  | 1.37  | #       | + | - | 14.346 | 35.378 | 19.627  | 0.83 | 1.26 | 1.34  |
| 25 | [Ni]c1cc(c(cc1C(=O)O)N)C(=O)O%13%21%34%49                                                                                                                                 | 1.13  | -       | - | + | 7.641  | 25.279 | 15.365  | 0.57 | 0.89 | 1.14  |
| 26 | [Zn]C(=C/C(=O)O)C(=O)O%11%20%49                                                                                                                                           | 1.20  | +       | * | - | 24.845 | 18.273 | 10.147  | 1.25 | 0.63 | 0.90  |
| 27 | [Zn]C(=C/C(=O)O)C(=O)O%11%20%30%49                                                                                                                                        | -0.05 | +       | - | + | 2.849  | 5.830  | -0.941  | 0.38 | 0.17 | 0.39  |
| 28 | [Zn]c1cc(cc2c1ccc(c2)C(=O)O)C(=O)O^CN(C)C=O%11%20%37%49                                                                                                                   | 0.85  | Outlier |   |   |        |        |         |      |      |       |
| 29 | [Cu][Si]c1cnccc1C#Cc2cncc2%11%20%30%49                                                                                                                                    | -0.72 | +       | # | - | 14.089 | 11.018 | 7.970   | 0.82 | 0.36 | 0.80  |
| 30 | [Cu][Si]c1cnccc1C#Cc2cncc3%11%20%30%49                                                                                                                                    | 0.73  |         |   |   |        |        |         |      |      |       |
| 31 | [Cr]CCNCCNC^c1cc(cc2c1cc(cc2)C(=O)O)C(=O)O%10%20%30%49                                                                                                                    | 0.59  | -       | + | + | -2.264 | 13.243 | 2.462   | 0.18 | 0.44 | 0.55  |
| 32 | [Cr]CCNCCNC^c1cc(cc2c1cc(cc2)C(=O)O)C(=O)O%10%20%30%49                                                                                                                    | 0.64  | -       | # | - | 8.676  | 18.018 | 2.072   | 0.61 | 0.62 | 0.53  |
| 33 | [Zn]c1cnccc1c2cncc2^OC(C1C(C(O)=O)C(C(O)=O)C(C(O)=O)C(C(O)=O)C1C(O)=O)=O%10%20%30%49                                                                                      | 0.18  | #       | - | + | 8.676  | 18.018 | 2.072   | 0.61 | 0.62 | 0.53  |
| 34 | [Mg]c1c(c(cc(c1O)C(=O)O)O)C(=O)O%12%20%30%49                                                                                                                              | 0.79  | -       | # | * | -5.152 | 11.028 | -12.907 | 0.07 | 0.36 | -0.16 |
| 35 | [Zn]OC(C1=CC=C(C2=CC=C(C3=NN=NN3)C=C2)C=C1)=O%10%20%30%49                                                                                                                 | 0.43  | +       | + | + | 8.912  | 20.263 | 2.088   | 0.62 | 0.70 | 0.53  |

|    |                                                                                                                                                                                                                                                |       |   |   |   |        |        |        |       |       |      |
|----|------------------------------------------------------------------------------------------------------------------------------------------------------------------------------------------------------------------------------------------------|-------|---|---|---|--------|--------|--------|-------|-------|------|
| 36 | [Cu]O=C(O)C1=CC=CC(C2=CC=C3C=CC(C4=CC(C(O)=O)=CC=C4)=CC3=C2)=C1%10%20%30%47                                                                                                                                                                    | 0.37  | - | - | # | -7.810 | -3.051 | -8.540 | -0.04 | -0.16 | 0.04 |
| 37 | [Cu]O=C(O)C1=CC=CC(C2=CC=C3C=CC(C4=CC(C(O)=O)=CC=C4)=CC3=C2)=C1%10%20%30%49                                                                                                                                                                    | -0.07 | * | # | + | 7.305  | 10.752 | 1.781  | 0.56  | 0.35  | 0.52 |
| 38 | [Cu]O=C(O)C1=CC=CC(C2=CC=C3C=CC(C4=CC(C(O)=O)=CC=C4)=CC3=C2)=C1%10%20%30%49                                                                                                                                                                    | -0.20 | * | - | - | -5.051 | -1.100 | -9.306 | 0.07  | -0.09 | 0.00 |
| 39 | [Al]O=C(C1=CC(C(O)=O)=C(C(O)=O)C=C1C(O)=O)O%10%20%30%49                                                                                                                                                                                        | 0.50  | # | * | + | -5.051 | -1.100 | -9.306 | 0.07  | -0.09 | 0.00 |
| 40 | [Zn]c1cc(c(cc1C(=O)O)C(=O)O)C(=O)O%10%20%30%49                                                                                                                                                                                                 | 0.27  | * | + | - | -8.101 | 5.164  | -8.971 | -0.05 | 0.14  | 0.02 |
| 41 | [Cu]O=C(C1=CC2=C(C=C1)N(C3=CC(C4=CC(N5C6=C(C7=C5C=CC(C(O)=O)=C7)C=C(C(O)=O)C=C6)=CC(N8C9=C(C%10=C8C=CC(C(O)=O)=C%10)C=C(C(O)=O)C=C9)=C4)=CC(N%11C%12=C(C%13=C%11C=CC(C(O)=O)=C%13)C=C(C(O)=O)C=C%12)=C3)C%14=C2C=C(C(O)=O)C=C%14)O%16%21%30%49 | 0.48  | + | * | # | -2.536 | 9.420  | -4.313 | 0.17  | 0.30  | 0.23 |
| 42 | [Co(II)][Co(III)]C12=NN=NC1=CC3=NN=NC3=C2%11%20%30%49                                                                                                                                                                                          | 0.83  | + | + | - | 0.963  | 15.446 | 0.347  | 0.31  | 0.52  | 0.45 |
| 43 | Mn(II)&Mn(III)C12=NN=NC1=CC3=NN=NC3=C2%12%20%30%49                                                                                                                                                                                             | 0.85  | * | + | # | 18.733 | 26.273 | 14.930 | 1.01  | 0.93  | 1.12 |
| 44 | [Zn]NC1=NNC=N1%11%20%30%49                                                                                                                                                                                                                     | 0.64  | + | - | + | 13.140 | 29.077 | 8.266  | 0.79  | 1.03  | 0.81 |
| 45 | [Cu]OC(C1=CC(C(O)=O)=CC(C2=CC=C(C3=CC(C(O)=O)=CC(C(O)=O)=C3)C4=NON=C42)=C1)=O%14%21%30%49                                                                                                                                                      | 0.64  | + | - | * | -1.106 | 8.088  | -1.743 | 0.23  | 0.25  | 0.35 |
| 46 | [Cu]OC(C1=CC(C(O)=O)=CC(C2=CC=C(C3=CC(C(O)=O)=CC(C(O)=O)=C3)C4=NON=C42)=C1)=O%14%21%30%49                                                                                                                                                      | 0.74  | - | - | + | 7.451  | 13.271 | 3.541  | 0.56  | 0.44  | 0.60 |
| 47 | [Cu]OC(C1=CC(C(O)=O)=CC(C2=CC=C(C3=CC(C(O)=O)=CC(C(O)=O)=C3)C4=NSN=C42)=C1)=O%13%21%30%49                                                                                                                                                      | 0.58  | * | * | * | 7.451  | 13.271 | 3.541  | 0.56  | 0.44  | 0.60 |
| 48 | [Cu]OC(C1=CC(C(O)=O)=CC(C2=CC=C(C3=CC(C(O)=O)=CC(C(O)=O)=C3)C4=NSN=C42)=C1)=O%13%21%30%49                                                                                                                                                      | 0.69  | + | + | - | 7.972  | 17.391 | 2.388  | 0.58  | 0.60  | 0.54 |
| 49 | [Cu]OC(C1=CC(C(O)=O)=CC(C2=CC=C(C3=CC(C(O)=O)=CC(C(O)=O)=C3)C4=NSN=C42)=C1)=O%13%21%30%49                                                                                                                                                      | 0.59  | * | # | + | 7.972  | 17.391 | 2.388  | 0.58  | 0.60  | 0.54 |
| 50 | [Cu]OC(C1=CC(C(O)=O)=CC(C2=CC=C(C3=CC(C(O)=O)=CC(C(O)=O)=C3)C4=N[Se]N=C42)=C1)=O%10%20%30%49                                                                                                                                                   | 0.22  | + | * | + | 7.972  | 17.391 | 2.388  | 0.58  | 0.60  | 0.54 |
| 51 | [Cu]OC(C1=CC(C(O)=O)=CC(C2=CC=C(C3=CC(C(O)=O)=CC(C(O)=O)=C3)C4=N[Se]N=C42)=C1)=O%10%20%30%49                                                                                                                                                   | 0.30  | # | * | + | -1.929 | 5.177  | -3.083 | 0.19  | 0.14  | 0.29 |

|    |                                                                                                                                                         |      |   |   |   |        |        |        |      |      |      |
|----|---------------------------------------------------------------------------------------------------------------------------------------------------------|------|---|---|---|--------|--------|--------|------|------|------|
|    | %49                                                                                                                                                     |      |   |   |   |        |        |        |      |      |      |
| 52 | [Cu]O=C(C1=CC(C2=C(CO)C(C)=C(C3=CC(C(O)=O)=CC(C(O)=O)=C3)C(CO)=C2C)=CC(C(O)=O)=C1)O%12%20%30%49                                                         | 0.66 | - | + | - | -1.929 | 5.177  | -3.083 | 0.19 | 0.14 | 0.29 |
| 53 | [Cu]c1cc(ccc1c2cc(cc(c2)C(=O)O)C(=O)O)c3cc(cc(c3)C(=O)O)C(=O)O%14%21%30%49                                                                              | 0.59 | + | * | + | 3.780  | 20.920 | 1.219  | 0.42 | 0.73 | 0.49 |
| 54 | [Cu]O=C(C1=CC(C2=CC=C(C3=CC(C(O)=O)=CC(C(O)=O)=C3)C=C2[N](O)=O)=CC(C(O)=O)=C1)O%13%21%30%49                                                             | 0.65 | # | * | * | 5.148  | 24.130 | 7.601  | 0.47 | 0.85 | 0.78 |
| 55 | [Cu]O=C(C1=CC(C2=CC=C(C3=CC(C(O)=O)=CC(C(O)=O)=C3)C=C2[N](O)=O)=CC(C(O)=O)=C1)O%13%21%30%49                                                             | 0.92 | - | * | - | 11.755 | 23.170 | 6.099  | 0.73 | 0.81 | 0.71 |
| 56 | [Cu]c1c(cc(cc1C(=O)O)C(=O)O)c2cc(cc(c2)C(=O)O)C(=O)O%11%20%30%49                                                                                        | 0.51 | + | + | + | 11.755 | 23.170 | 6.099  | 0.73 | 0.81 | 0.71 |
| 57 | [Cu]O=C(NC1=CC(C(O)=O)=CC(C(O)=O)=C1)C2=CC=C(C(NC3=CC(C(O)=O)=CC(C(O)=O)=C3)=O)C=C2%12%20%30%49                                                         | 0.62 | - | # | * | 0.683  | 19.387 | 2.349  | 0.30 | 0.67 | 0.54 |
| 58 | [Cu]O=C(NC1=CC(C(O)=O)=CC(C(O)=O)=C1)C(NC2=CC(C(O)=O)=CC(C(O)=O)=C2)=O%13%21%30%49                                                                      | 0.58 | - | - | - | 7.883  | 19.181 | 1.522  | 0.58 | 0.66 | 0.50 |
| 59 | [Cu]O=C(NC1=CC(C(O)=O)=CC(C(O)=O)=C1)C(NC2=CC(C(O)=O)=CC(C(O)=O)=C2)=O%13%21%30%49                                                                      | 0.62 | # | # | * | 8.765  | 17.894 | 4.574  | 0.62 | 0.61 | 0.64 |
| 60 | [Cu]O=C(NC1=CC(C(O)=O)=CC(C(O)=O)=C1)C(NC2=CC(C(O)=O)=CC(C(O)=O)=C2)=O%13%21%30%49                                                                      | 0.96 | + | + | + | 8.765  | 17.894 | 4.574  | 0.62 | 0.61 | 0.64 |
| 61 | [Cu]OC(C1=CC(C(O)=O)=CC([N](C2)=NN=C2C3=CC(C4=NN=[N](C5=CC(C(O)=O)=CC(C(O)=O)=C5)C4)=CC(C6=NN=[N](C7=CC(C(O)=O)=CC(C(O)=O)=C7)C6)=C3)=C1)=O%15%21%30%49 | 0.96 | - | + | # | 8.765  | 17.894 | 4.574  | 0.62 | 0.61 | 0.64 |
| 62 | [Cu]OC(C1=CC(C(O)=O)=CC([N](C2)=NN=C2C3=CC(C4=NN=[N](C5=CC(C(O)=O)=CC(C(O)=O)=C5)C4)=CC(C6=NN=[N](C7=CC(C(O)=O)=CC(C(O)=O)=C7)C6)=C3)=C1)=O%15%21%30%49 | 0.67 | + | # | # | 14.169 | 23.899 | 4.618  | 0.83 | 0.84 | 0.65 |
| 63 | [Cu]OC(C1=CC(C(O)=O)=CC(C#CC2=CC(C#CC3=CC(C(O)=O)=CC(C(O)=O)=C3)=CC(C#CC4=CC(C(O)=O)=CC(C(O)=O)=C4)=C2)=C1)=O%15%21%30%49                               | 0.69 | + | - | - | 14.169 | 23.899 | 4.618  | 0.83 | 0.84 | 0.65 |
| 64 | [Cu]OC(C1=CC(C(O)=O)=CC(C#CC2=CC(C#CC3=CC(C(O)=O)=CC(C(O)=O)=C3)=CC(C#CC4=CC(C(O)=O)=CC(C(O)=O)=C4)=C2)=C1)=O%15%21%33%49                               | 1.33 | # | * | - | 12.213 | 32.067 | 5.778  | 0.75 | 1.14 | 0.70 |
| 65 | [Cu]O=C(C1=CC(C(O)=O)=CC(C#CC2=CC=C(N(C3=CC=C(C#CC4=CC(C(O)=O)=CC(C(O)=O)=C4)C=C3)C5=CC=C                                                               | 0.70 | - | * | * | 25.138 | 43.775 | 18.736 | 1.26 | 1.58 | 1.30 |

|    |                                                                                                                                                                                      |      |   |   |   |        |        |        |      |      |      |
|----|--------------------------------------------------------------------------------------------------------------------------------------------------------------------------------------|------|---|---|---|--------|--------|--------|------|------|------|
|    | <chem>(C#CC6=CC(C(O)=O)=CC(C(O)=O)=C6)C=C5)C=C2)=C1)O%16%22%30%49</chem>                                                                                                             |      |   |   |   |        |        |        |      |      |      |
| 66 | <chem>[Cu]O=C(C1=CC(C(O)=O)=CC(C#CC2=CC=C(N(C3=CC=C(C#CC4=CC(C(O)=O)=CC(C(O)=O)=C4)C=C3)C5=CC=C(C#CC6=CC(C(O)=O)=CC(C(O)=O)=C6)C=C5)C=C2)=C1)O%16%22%33%49</chem>                    | 1.34 | - | - | * | 10.248 | 19.377 | 1.191  | 0.67 | 0.67 | 0.49 |
| 67 | <chem>[Cu]O=C(C1=CC(C(O)=O)=CC(C#CC2=CC=C(C3=CC(C4=CC=C(C#CC5=CC(C(O)=O)=CC(C(O)=O)=C5)C=C4)=CC(C6=CC=C(C#CC7=CC(C(O)=O)=CC(C(O)=O)=C7)C=C6)=C3)C=C2)=C1)O%18%22%30%49</chem>        | 0.70 | - | # | - | 28.479 | 37.103 | 15.054 | 1.39 | 1.33 | 1.13 |
| 68 | <chem>[Cu]O=C(C1=CC(C(O)=O)=CC(C#CC2=CC=C(C3=CC(C4=CC=C(C#CC5=CC(C(O)=O)=CC(C(O)=O)=C5)C=C4)=CC(C6=CC=C(C#CC7=CC(C(O)=O)=CC(C(O)=O)=C7)C=C6)=C3)C=C2)=C1)O%18%22%33%49</chem>        | 1.34 | # | * | # | 9.616  | 18.640 | 7.416  | 0.65 | 0.64 | 0.78 |
| 69 | <chem>[Cu]OC(C1=CC(C(O)=O)=CC(NC2=CC(C(NC3=CC(C(O)=O)=CC(C(O)=O)=C3)=O)=CC(C(NC4=CC(C(O)=O)=CC(C(O)=O)=C4)=O)=C2)=O)=C1)O%15%21%33%49</chem>                                         | 1.37 | # | * | - | 27.847 | 36.366 | 21.279 | 1.37 | 1.30 | 1.42 |
| 70 | <chem>[Cu]O=C(C1=CC=C(C2=CC(C3=CC=C(C(NC4=CC(C(O)=O)=CC(C(O)=O)=C4)=O)C=C3)=CC(C5=CC=C(C(NC6=C(C(O)=O)=CC(C(O)=O)=C6)=O)C=C5)=C2)C=C1)NC7=C(C(O)=O)=CC(C(O)=O)=C7%15%22%33%49</chem> | 1.55 | * | # | - | 22.001 | 37.159 | 17.752 | 1.14 | 1.33 | 1.25 |
| 71 | <chem>[Cu]O=C(C1=CC=C(C2=CC(C3=CC=C(C(NC4=CC(C(O)=O)=CC(C(O)=O)=C4)=O)C=C3)=CC(C5=CC=C(C(NC6=C(C(O)=O)=CC(C(O)=O)=C6)=O)C=C5)=C2)C=C1)NC7=C(C(O)=O)=CC(C(O)=O)=C7%15%22%33%49</chem> | 1.40 | # | * | # | 22.906 | 38.356 | 21.520 | 1.17 | 1.38 | 1.43 |
| 72 | <chem>[Cu]O=C(C1=CC=C(C2=NC(C3=CC=C(C(NC4=CC(C(O)=O)=CC(C(O)=O)=C4)=O)C=C3)=NC(C5=CC=C(C(NC6=C(C(O)=O)=CC(C(O)=O)=C6)=O)C=C5)=N2)C=C1)NC7=C(C(O)=O)=CC(C(O)=O)=C7%15%22%33%49</chem> | 1.55 | # | + | + | 22.906 | 38.356 | 21.520 | 1.17 | 1.38 | 1.43 |
| 73 | <chem>[Cu]O=C(C1=CC=C(C2=NC(C3=CC=C(C(NC4=CC(C(O)=O)=CC(C(O)=O)=C4)=O)C=C3)=NC(C5=CC=C(C(NC6=C(C(O)=O)=CC(C(O)=O)=C6)=O)C=C5)=N2)C=C1)NC7=C(C(O)=O)=CC(C(O)=O)=C7%15%22%33%49</chem> | 1.40 | # | # | * | 26.104 | 41.055 | 21.680 | 1.30 | 1.48 | 1.43 |
| 74 | <chem>[Zn]C1=CC(=CC=C1C2=CC(=CC(=C2)C3=CC=C(C=C3)C(=O)O)C4=CC=C(C=C4)C(=O)O)C(=O)O^c1cc(cc2c1cc(cc2)C(=O)O)C(=O)O%17%22%39%49</chem>                                                 | 1.58 | # | # | + | 26.104 | 41.055 | 21.680 | 1.30 | 1.48 | 1.43 |
| 75 | <chem>[Zn]C1=CC(=CC=C1C2=CC(=CC(=C2)C3=CC=C(C=C3)C(=O)O)C4=CC=C(C=C4)C(=O)O)C(=O)O^c1cc(cc2c1cc(cc2)C(=O)O)C(=O)O%17%22%33%49</chem>                                                 | 1.53 | - | - | # | 31.795 | 48.289 | 21.240 | 1.52 | 1.74 | 1.41 |



|    |                                                                                                                                    |      |   |   |   |        |        |        |      |      |      |
|----|------------------------------------------------------------------------------------------------------------------------------------|------|---|---|---|--------|--------|--------|------|------|------|
| 76 | [Zn]C1=CC(=CC=C1C2=CC(=CC(=C2)C3=CC=C(C=C3)C(=O)O)C4=CC=C(C=C4)C(=O)O)C(=O)O^c1cc(cc2c1cc(cc2)C(=O)O)C(=O)O%17%22%33%49            | 1.41 | - | - | + | 23.536 | 43.852 | 24.390 | 1.20 | 1.58 | 1.56 |
| 77 | [Zn]O=C(O)C(C=C1)=CC=C1C#CC2=CC(C#CC3=CC=C(C(O)=O)C=C3)=CC(C#CC4=CC=C(C(O)=O)C=C4)=C2^c1cc(ccc1c2ccc(cc2)C(=O)O)C(=O)O%19%24%33%49 | 1.74 | - | + | * | 23.536 | 43.852 | 24.390 | 1.20 | 1.58 | 1.56 |
| 78 | [Zn]O=C(O)C(C=C1)=CC=C1C#CC2=CC(C#CC3=CC=C(C(O)=O)C=C3)=CC(C#CC4=CC=C(C(O)=O)C=C4)=C2^c1cc(ccc1c2ccc(cc2)C(=O)O)C(=O)O%19%24%33%49 | 1.20 | * | + | # | 34.958 | 40.512 | 17.635 | 1.65 | 1.46 | 1.25 |
| 79 | [Cu]O=C(O)C1=CC(C(O)=O)=CC(NC(C2=CC=C(C(O)=O)C=C2)=O)=C1%14%21%30%49                                                               | 0.79 | # | - | # | 34.958 | 40.512 | 17.635 | 1.65 | 1.46 | 1.25 |
| 80 | [Cu]O=C(O)C1=CC(C(O)=O)=CC(NC(C2=CC=C(C(O)=O)C=C2)=O)=C1%14%21%33%49                                                               | 1.34 | + | * | + | 10.315 | 20.988 | 3.388  | 0.68 | 0.73 | 0.59 |
| 81 | [Cu]O=C(O)C1=CC(C(O)=O)=CC(NC(C2=CC=C(C(O)=O)C=C2)=O)=C1%14%21%33%49                                                               | 1.26 | * | - | * | 23.240 | 32.696 | 16.346 | 1.18 | 1.16 | 1.19 |
| 82 | [Cu]O=C(NC1=CC(C(O)=O)=CC(C(O)=O)=C1)C2=CN=CC(C(NC3=CC(C(O)=O)=CC(C(O)=O)=C3)=O)=C2%12%20%30%49                                    | 0.81 | - | - | + | 23.240 | 32.696 | 16.346 | 1.18 | 1.16 | 1.19 |
| 83 | [Cu]O=C(NC1=CC(C(O)=O)=CC(C(O)=O)=C1)C2=CN=CC(C(NC3=CC(C(O)=O)=CC(C(O)=O)=C3)=O)=C2%12%20%30%49                                    | 0.73 | - | + | + | 10.478 | 21.736 | 4.233  | 0.68 | 0.76 | 0.63 |
| 84 | [Cu]O=C(NC1=CC(C(O)=O)=CC(C(O)=O)=C1)C2=CN=CC(C(NC3=CC(C(O)=O)=CC(C(O)=O)=C3)=O)=C2%12%20%30%49                                    | 0.62 | + | * | # | 10.478 | 21.736 | 4.233  | 0.68 | 0.76 | 0.63 |
| 85 | [Cu]O=C(NCC(O)=O)C1=CC(C(NCC(O)=O)=O)=CC(C(NC(O)=O)=O)=C1^C1(CCCC2=CC=NC=C2)=CC=NC=C1%11%20%30%49                                  | 0.30 | + | * | + | 10.478 | 21.736 | 4.233  | 0.68 | 0.76 | 0.63 |
| 86 | [Cu]O=C(NCC(O)=O)C1=CC(C(NCC(O)=O)=O)=CC(C(NC(O)=O)=O)=C1^C1(CCCC2=CC=NC=C2)=CC=NC=C2%11%20%33%49                                  | 0.74 | + | + | # | 7.089  | 19.785 | 8.126  | 0.55 | 0.68 | 0.81 |
| 87 | [Zn]O=C(O)C1=CC=C(OC2=CC=C(C=C2)C(O)=O)C=C1^C1(/N=C/C2=CC=NC=C2)=CC=C(/N=C/C3=CC=NC=C3)C=C1%10%20%30%47                            | 0.95 | - | + | # | 28.716 | 30.232 | 20.058 | 1.40 | 1.07 | 1.36 |
| 88 | [Zn]O=C(O)C1=CC=C(OC2=CC=C(C=C2)C(O)=O)C=C1^C1(/N=C/C2=CC=NC=C2)=C3C=CC=C(/N=C/C4=CC=NC=C4)C3=CC=C1%10%20%30%47                    | 0.65 | + | # | + | 11.510 | 16.404 | 6.684  | 0.72 | 0.56 | 0.74 |

|     |                                                                                                                         |      |   |   |   |        |        |        |      |      |      |
|-----|-------------------------------------------------------------------------------------------------------------------------|------|---|---|---|--------|--------|--------|------|------|------|
| 89  | [Zn]O=C(O)C1=CC=C(OC2=CC=C(C=C2)C(O)=O)C=C1^<br>O=C(NC1=CC=NC=C1)C2=CC=C(C(NC3=CC=NC=C3)=O)<br>C=C2%11%20%30%47         | 0.86 | # | # | + | 11.156 | 14.320 | 4.474  | 0.71 | 0.48 | 0.64 |
| 90  | [Zn]O=C(O)C1=CC=C(OC2=CC=C(C=C2)C(O)=O)C=C1^<br>O=C(NC1=CC=C(NC(C2=CC=NC=C2)=O)C=C1)C3=CC=<br>NC=C3%10%20%30%47         | 0.86 | # | * | - | 24.058 | 25.183 | 14.719 | 1.22 | 0.89 | 1.11 |
| 91  | [Zn]O=C(O)C1=CC=C(OC2=CC=C(C=C2)C(O)=O)C=C1^<br>O=C(NC1=CC=CC2=C(NC(C3=CC=NC=C3)=O)C=CC=C1<br>2)C4=CC=NC=C4%10%20%30%47 | 0.80 | - | - | * | 17.507 | 21.813 | 8.810  | 0.96 | 0.76 | 0.84 |
| 92  | [Zn]O=C(C1=CC=C(C2=CC=C(C(O)=O)C=C2OC(N(C)C)=<br>S)C=C1)O%12%24%30%49                                                   | 0.34 | + | # | # | 19.041 | 14.191 | 9.121  | 1.02 | 0.48 | 0.85 |
| 93  | [Zn]O=C(C1=CC=C(C2=CC=C(C(O)=O)C=C2SC(N(C)C)=<br>O)C=C1)O%12%29%30%49                                                   | 0.40 | + | + | # | 0.615  | 9.034  | 1.307  | 0.29 | 0.29 | 0.49 |
| 94  | [Ni]C1(C2=CN=C2)=CC=C(C3=CN=C3)C=C1%12%20<br>%35%49                                                                     | 1.00 | * | # | # | 3.488  | 8.896  | -1.580 | 0.41 | 0.28 | 0.36 |
| 95  | [Zn]C1(C2=CN=C2)=CC=C(C3=CN=C3)C=C1%13%20<br>%35%49                                                                     | 0.96 | - | * | - | 16.381 | 24.387 | 12.762 | 0.92 | 0.86 | 1.02 |
| 96  | [Fe]C1(C#CC2=CN=C2)=CC=C(C#CC3=CN=C3)C=C1<br>%12%21%31%49                                                               | 0.96 | * | - | * | 18.385 | 27.641 | 15.814 | 0.99 | 0.98 | 1.16 |
| 97  | [Fe]C1(C#CC2=CN=C2)=CC=C(C#CC3=CN=C3)C=C1<br>%12%21%31%49                                                               | 1.08 | # | - | * | 19.099 | 26.533 | 15.611 | 1.02 | 0.94 | 1.15 |
| 98  | [Fe]C1(C#CC2=CN=C2)=CC=C(C#CC3=CN=C3)C=C1<br>%12%21%30%47                                                               | 1.13 | * | - | # | 19.099 | 26.533 | 15.611 | 1.02 | 0.94 | 1.15 |
| 99  | [Ni]C1(C#CC2=CN=C2)=CC=C(C#CC3=CN=C3)C=C1<br>%13%21%31%49                                                               | 0.77 | + | * | * | 21.874 | 28.484 | 13.367 | 1.13 | 1.01 | 1.05 |
| 100 | [Ni]C1(C#CC2=CN=C2)=CC=C(C#CC3=CN=C3)C=C1<br>%13%21%31%49                                                               | 0.93 | * | - | * | 19.730 | 25.020 | 15.105 | 1.05 | 0.88 | 1.13 |
| 101 | [Ni]C1(C#CC2=CN=C2)=CC=C(C#CC3=CN=C3)C=C1<br>%13%21%30%47                                                               | 1.06 | + | - | * | 19.730 | 25.020 | 15.105 | 1.05 | 0.88 | 1.13 |
| 102 | [Zn]C1(C#CC2=CN=C2)=CC=C(C#CC3=CN=C3)C=C1<br>%11%20%31%49                                                               | 0.72 | - | + | + | 22.505 | 26.971 | 12.861 | 1.16 | 0.95 | 1.03 |
| 103 | [Zn]C1(C#CC2=CN=C2)=CC=C(C#CC3=CN=C3)C=C1<br>%11%20%31%49                                                               | 0.91 | - | * | - | 16.302 | 28.829 | 7.816  | 0.91 | 1.02 | 0.79 |
| 104 | [Zn]C1(C#CC2=CN=C2)=CC=C(C#CC3=CN=C3)C=C1<br>%11%20%30%47                                                               | 1.05 | * | + | * | 16.302 | 28.829 | 7.816  | 0.91 | 1.02 | 0.79 |
| 105 | [Zn]c1cc(ccc1C(=O)O)C(=O)O^C1CN2CCN1CC2%13%21<br>%33%49                                                                 | 0.94 | # | - | * | 19.057 | 30.927 | 13.609 | 1.02 | 1.10 | 1.06 |
| 106 | [Zn]O=C(C1=CC(Br)=C(C(O)=O)C=C1)O^C1CN2CCN1CC<br>2%12%20%33%49                                                          | 0.74 | # | # | # | 15.745 | 25.704 | 11.850 | 0.89 | 0.90 | 0.98 |

|     |                                                                             |       |   |   |   |        |        |         |       |       |       |
|-----|-----------------------------------------------------------------------------|-------|---|---|---|--------|--------|---------|-------|-------|-------|
| 107 | [Zn]O=C(C1=CC(N(=O)=O)=C(C(O)=O)C=C1)O^C1CN2CCN1CC2%12%20%33%49             | 0.86  | + | * | + | 14.611 | 24.299 | 8.744   | 0.85  | 0.85  | 0.84  |
| 108 | [Zn]O=C(C1=C(F)C(F)=C(C(O)=O)C(F)=C1F)O^C1CN2CCN1CC2%11%20%33%49            | 0.57  | - | + | + | 12.652 | 25.585 | 10.386  | 0.77  | 0.90  | 0.91  |
| 109 | [Zn]O=C(C1=CC(Cl)=C(C(O)=O)C=C1Cl)O^C1CN2CCN1CC2%11%20%33%49                | 0.78  | * | # | - | 9.555  | 14.416 | -1.489  | 0.65  | 0.49  | 0.36  |
| 110 | [Zn]O=C(C1=CC(O)=C(C(O)=O)C=C1)O^C1CN2CCN1CC2%11%20%33%49                   | 0.75  | - | - | # | 23.607 | 30.836 | 9.196   | 1.20  | 1.10  | 0.86  |
| 111 | [Zn]O=C(C1=CC(C)=C(C(O)=O)C=C1C)O^C1CN2CCN1CC2%11%20%33%49                  | 0.76  | + | # | + | 12.484 | 25.580 | 8.363   | 0.76  | 0.90  | 0.82  |
| 112 | [Zn]O=C(C1=C(C)C(C)=C(C(O)=O)C(C)=C1C)O^C1CN2CCN1CC2%11%20%33%49            | 0.73  | # | # | * | 13.476 | 25.962 | 10.168  | 0.80  | 0.91  | 0.90  |
| 113 | [Zn]O=C(C1=C(C=CC=C2)C2=C(C(O)=O)C3=C1C=CC=C3)O^C1CN2CCN1CC2%11%20%33%49    | 0.59  | + | # | - | 14.026 | 28.812 | 9.766   | 0.82  | 1.02  | 0.88  |
| 114 | [Zr]c1cc(ccc1C(=O)O)C(=O)O%12%20%30%49                                      | 0.15  | + | # | + | 12.444 | 27.205 | 7.484   | 0.76  | 0.96  | 0.78  |
| 115 | [Ti][Zr]c1cc(ccc1C(=O)O)C(=O)O%12%21%30%49                                  | 0.30  | # | + | # | -9.092 | 1.358  | -13.667 | -0.09 | 0.00  | -0.20 |
| 116 | [Mg]c1c(c(cc(c1[O])C(=O)[O])[O])C(=O)[O]%12%20%30%49                        | 0.73  | # | * | + | -3.285 | 6.023  | -7.850  | 0.14  | 0.17  | 0.07  |
| 117 | [Mg]c1c(c(cc(c1[O])C(=O)[O])[O])C(=O)[O]%12%20%30%49                        | 0.90  | * | # | # | 10.049 | 15.552 | 9.245   | 0.67  | 0.53  | 0.86  |
| 118 | [Ni]c1c(c(cc(c1[O])C(=O)[O])[O])C(=O)[O]%11%20%30%49                        | 0.42  | + | # | + | 10.049 | 15.552 | 9.245   | 0.67  | 0.53  | 0.86  |
| 119 | [Ni]c1c(c(cc(c1[O])C(=O)[O])[O])C(=O)[O]%11%20%30%49                        | 0.76  | - | - | - | 6.636  | 9.666  | -0.341  | 0.53  | 0.31  | 0.42  |
| 120 | [Co]c1c(c(cc(c1[O])C(=O)[O])[O])C(=O)[O]%11%20%30%49                        | 0.42  | - | + | # | 6.636  | 9.666  | -0.341  | 0.53  | 0.31  | 0.42  |
| 121 | [Co]c1c(c(cc(c1[O])C(=O)[O])[O])C(=O)[O]%11%20%30%49                        | 0.84  | # | # | * | 7.328  | 10.658 | 3.607   | 0.56  | 0.35  | 0.60  |
| 122 | [Zn]c1c(c(cc(c1[O])C(=O)[O])[O])C(=O)[O]%11%20%30%49                        | 0.12  | + | * | - | 7.328  | 10.658 | 3.607   | 0.56  | 0.35  | 0.60  |
| 123 | [Zn]c1c(c(cc(c1[O])C(=O)[O])[O])C(=O)[O]%11%20%30%49                        | 0.74  | + | + | + | 9.495  | 14.341 | 4.129   | 0.64  | 0.48  | 0.62  |
| 124 | [Ni]c1cc(ccc1C(=O)O)C(=O)O^c1ncccc1c2nc(nc(n2)c3cncnc3)c4cncnc4%11%20%30%49 | -0.14 | # | - | # | 9.495  | 14.341 | 4.129   | 0.64  | 0.48  | 0.62  |
| 125 | [Ni]c1cc(ccc1C(=O)O)C(=O)O^c1ncccc1c2nc(nc(n2)c3cncnc3)c4cncnc5%11%20%30%49 | -0.46 | * | + | * | -0.351 | 0.526  | -7.831  | 0.26  | -0.03 | 0.07  |

|     |                                                                                      |       |         |   |   |         |        |         |       |       |       |
|-----|--------------------------------------------------------------------------------------|-------|---------|---|---|---------|--------|---------|-------|-------|-------|
| 126 | [Ni]c1cc(ccc1C(=O)O)C(=O)O^c1cccc1c2nc(nc(n2)c3ccncc3)c4ccncc6%11%20%30%49           | 0.78  | #       | # | + | -16.185 | -2.850 | -19.986 | -0.37 | -0.16 | -0.49 |
| 127 | [Ni]c1cc(ccc1C(=O)O)C(=O)O^c1cccc1c2nc(nc(n2)c3ccncc3)c4ccncc7%11%20%30%49           | 0.52  | -       | - | - | 9.138   | 11.622 | -0.941  | 0.63  | 0.38  | 0.39  |
| 128 | [Ni]O=C(C1=CC(O)=C(C(O)=O)C=C1O)O^c1cccc1c2nc(nc(n2)c3ccncc3)c4ccncc4%11%20%30%49    | 0.38  | -       | + | + | -2.170  | 7.323  | 0.602   | 0.18  | 0.22  | 0.46  |
| 129 | [Ni]O=C(C1=CC(O)=C(C(O)=O)C=C1O)O^c1cccc1c2nc(nc(n2)c3ccncc3)c4ccncc4%11%20%30%49    | 0.01  | +       | - | - | 0.530   | 4.146  | -7.085  | 0.29  | 0.10  | 0.11  |
| 130 | [Ni]O=C(C1=CC(O)=C(C(O)=O)C=C1O)O^c1cccc1c2nc(nc(n2)c3ccncc3)c4ccncc5%11%20%30%49    | 0.89  | Outlier |   |   |         |        |         |       |       |       |
| 131 | [Ni]O=C(C1=CC(O)=C(C(O)=O)C=C1O)O^c1cccc1c2nc(nc(n2)c3ccncc3)c4ccncc4%11%20%30%49    | 0.75  | +       | - | + | 0.530   | 4.146  | -7.085  | 0.29  | 0.10  | 0.11  |
| 132 | [Ni]c1cc(c(cc1C(=O)O)N)C(=O)O^c1cccc1c2nc(nc(n2)c3ccncc3)c4ccncc4%11%20%30%49        | 0.06  | #       | + | - | -0.236  | 4.200  | -4.951  | 0.26  | 0.11  | 0.20  |
| 133 | [Ni]c1cc(c(cc1C(=O)O)N)C(=O)O^c1cccc1c2nc(nc(n2)c3ccncc3)c4ccncc5%11%20%30%49        | -0.23 | *       | # | + | -16.071 | 0.824  | -17.106 | -0.36 | -0.02 | -0.36 |
| 134 | [Ni]c1cc(c(cc1C(=O)O)N)C(=O)O^c1cccc1c2nc(nc(n2)c3ccncc3)c4ccncc6%11%20%30%49        | 0.78  | +       | * | + | 9.253   | 15.296 | 1.939   | 0.63  | 0.52  | 0.52  |
| 135 | [Ni]c1cc(c(cc1C(=O)O)N)C(=O)O^c1cccc1c2nc(nc(n2)c3ccncc3)c4ccncc7%11%20%30%49        | 0.60  | -       | + | - | -2.055  | 10.997 | 3.482   | 0.19  | 0.36  | 0.59  |
| 136 | [Ni]c1ccc2c(c1)c(ccc2C(=O)O)C(=O)O^c1cccc1c2nc(nc(n2)c3ccncc3)c4ccncc4%10%20%30%49   | -0.35 | +       | - | # | -11.943 | -6.782 | -10.565 | -0.20 | -0.30 | -0.06 |
| 137 | [Ni]c1ccc2c(c1)c(ccc2C(=O)O)C(=O)O^c1cccc1c2nc(nc(n2)c3ccncc3)c4ccncc4%10%20%30%49   | -0.66 | +       | - | - | -11.943 | -6.782 | -10.565 | -0.20 | -0.30 | -0.06 |
| 138 | [Ni]c1ccc2c(c1)c(ccc2C(=O)O)C(=O)O^c1cccc1c2nc(nc(n2)c3ccncc3)c4ccncc4%10%20%30%49   | 0.21  | -       | + | # | -11.943 | -6.782 | -10.565 | -0.20 | -0.30 | -0.06 |
| 139 | [Ni]c1ccc2c(c1)c(ccc2C(=O)O)C(=O)O^c1cccc1c2nc(nc(n2)c3ccncc3)c4ccncc4%10%20%30%49   | 0.04  | +       | + | - | -11.943 | -6.782 | -10.565 | -0.20 | -0.30 | -0.06 |
| 140 | [Ni]c1cc(cc2c1cc(cc2)C(=O)O)C(=O)O^c1cccc1c2nc(nc(n2)c3ccncc3)c4ccncc4%11%20%30%49   | -0.35 | -       | # | + | -3.927  | -1.046 | -8.736  | 0.12  | -0.09 | 0.03  |
| 141 | [Ni]c1cc(cc2c1cc(cc2)C(=O)O)C(=O)O^c1cccc1c2nc(nc(n2)c3ccncc3)c4ccncc5%11%20%30%49   | -0.64 | +       | + | - | -19.761 | -4.422 | -20.891 | -0.51 | -0.22 | -0.53 |
| 142 | [Ni]c1cc(cc2c1cc(cc2)C(=O)O)C(=O)O^c1cccc1c2nc(nc(n2)c3ccncc3)c4ccncc6%11%20%30%49   | 0.50  | *       | + | + | 5.563   | 10.050 | -1.846  | 0.49  | 0.32  | 0.35  |
| 143 | [Ni]c1cc(cc2c1cc(cc2)C(=O)O)C(=O)O^c1cccc1c2nc(nc(n2)c3ccncc3)c4ccncc4%11%20%30%49   | 0.29  | +       | - | # | -3.927  | -1.046 | -8.736  | 0.12  | -0.09 | 0.03  |
| 144 | [Ni]c1cc(ccc1c2ccc(cc2)C(=O)O)C(=O)O^c1cccc1c2nc(nc(n2)c3ccncc3)c4ccncc4%11%20%30%49 | -0.46 | -       | + | - | -3.315  | -2.250 | -9.762  | 0.14  | -0.13 | -0.02 |

|     |                                                                                                                                               |       |         |   |   |         |        |         |       |       |       |
|-----|-----------------------------------------------------------------------------------------------------------------------------------------------|-------|---------|---|---|---------|--------|---------|-------|-------|-------|
| 145 | [Ni]c1cc(ccc1c2ccc(cc2)C(=O)O)C(=O)O^c1cnccc1c2nc(nc(n2)c3ccncc3)c4ccncc5%11%20%30%49                                                         | -0.68 | +       | # | # | -19.150 | -5.626 | -21.917 | -0.48 | -0.26 | -0.58 |
| 146 | [Ni]c1cc(ccc1c2ccc(cc2)C(=O)O)C(=O)O^c1cnccc1c2nc(nc(n2)c3ccncc3)c4ccncc6%11%20%30%49                                                         | 0.29  | *       | - | + | 6.174   | 8.846  | -2.872  | 0.51  | 0.28  | 0.30  |
| 147 | [Ni]c1cc(ccc1c2ccc(cc2)C(=O)O)C(=O)O^c1cnccc1c2nc(nc(n2)c3ccncc3)c4ccncc7%11%20%30%49                                                         | 0.12  | -       | # | # | -5.134  | 4.547  | -1.329  | 0.07  | 0.12  | 0.37  |
| 148 | [Ni]&[Fe]c1cc(ccc1C(=O)O)C(=O)O^c1cnccc1c2ccncc2%11%20%30%49                                                                                  | 0.65  | #       | # | - | 9.539   | -1.254 | -2.293  | 0.65  | -0.10 | 0.33  |
| 149 | [Ni][Fe]c1cc(ccc1C(=O)O)C(=O)O^c1cnccn1%10%20%30%49                                                                                           | 0.38  | *       | # | + | 9.763   | 2.210  | -2.930  | 0.65  | 0.03  | 0.30  |
| 150 | [Cu]C1(C2=CN=N2)=CC(C3=CN=N3)=CC(C4=CN=N4)=C1^CNCCNC%11%20%30%49                                                                              | 0.62  | +       | * | + | 13.433  | 8.299  | -0.453  | 0.80  | 0.26  | 0.41  |
| 151 | [Cu]C1(C2=CN=N2)=CC(C3=CN=N3)=CC(C4=CN=N4)=C1^CNCCNC%11%20%30%49                                                                              | 0.38  | *       | - | # | 13.433  | 8.299  | -0.453  | 0.80  | 0.26  | 0.41  |
| 152 | [Cu]C1(C2=CN=N2)=CC(C3=CN=N3)=CC(C4=CN=N4)=C1%12%20%30%49                                                                                     | 0.58  | -       | + | * | 3.277   | 4.995  | -8.545  | 0.40  | 0.13  | 0.04  |
| 153 | [Cu]C1(C2=CN=N2)=CC(C3=CN=N3)=CC(C4=CN=N4)=C1%12%20%30%49                                                                                     | -0.17 | +       | + | - | 3.277   | 4.995  | -8.545  | 0.40  | 0.13  | 0.04  |
| 154 | [K][Co]C(C(=O)O)C(CC(=O)O)(C(=O)O)O%11%20%30%49                                                                                               | 0.63  | +       | + | + | 9.951   | 15.471 | 1.988   | 0.66  | 0.52  | 0.52  |
| 155 | [Cu]OC(C1=CC(C(O)=O)=CC(C2=CC(C3=CC(C(O)=O)=C(C(O)=O)=C3)=CC(C4=CC(C(O)=O)=CC(C(O)=O)=C4)=C2)=C1)=O%11%20%30%49                               | 0.52  | -       | * | * | 1.714   | 13.987 | 1.594   | 0.34  | 0.47  | 0.51  |
| 156 | [Cu]OC(C1=CC(C(O)=O)=CC(C2=CC(C3=CC(C(O)=O)=C(C(O)=O)=C3)=CC(C4=CC(C(O)=O)=CC(C(O)=O)=C4)=C2)=C1)=O%11%20%30%49                               | -0.24 | Outlier |   |   |         |        |         |       |       |       |
| 157 | [Zn]OC1=C(C(O)=O)C=CC=C1C(O)=O^C1CN2CCN1CC2%11%20%30%49                                                                                       | 0.49  | #       | + | * | -2.892  | 10.863 | -0.272  | 0.16  | 0.35  | 0.42  |
| 158 | [Cu]O=C(O)C1=CC(C2=C(C3=CC(C(O)=O)=CC(C(O)=O)=C3)C=C(C4=CC(C(O)=O)=CC(C(O)=O)=C4)C(C5=CC(C(O)=O)=CC(C(O)=O)=C5)=C2)=CC(C(O)=O)=C1%11%20%30%49 | 0.46  | *       | # | - | 0.133   | 19.750 | -2.522  | 0.28  | 0.68  | 0.32  |
| 159 | [Zn]O=C(O)C1=CC(C2=C(C3=CC(C(O)=O)=CC(C(O)=O)=C3)C=C(C4=CC(C(O)=O)=CC(C(O)=O)=C4)C(C5=CC(C(O)=O)=CC(C(O)=O)=C5)=C2)=CC(C(O)=O)=C1%11%20%30%49 | 0.37  | -       | + | # | 1.229   | 21.527 | -0.923  | 0.32  | 0.75  | 0.39  |
| 160 | [Cu]OC1=C(C(O)=O)C=CC=C1C(O)=O^C1(C2=CC=NC=C2)=CC=NC=C1%10%20%30%49                                                                           | 0.13  | +       | # | * | -7.546  | -1.247 | -3.130  | -0.03 | -0.10 | 0.29  |

|     |                                                                                                                                                                                                |       |   |   |   |         |        |         |       |       |       |
|-----|------------------------------------------------------------------------------------------------------------------------------------------------------------------------------------------------|-------|---|---|---|---------|--------|---------|-------|-------|-------|
| 161 | [Zn]c1cc(c(cc1C(=O)O)C(=O)O)C(=O)O%10%20%30%49                                                                                                                                                 | 0.24  | - | # | * | -2.536  | 9.420  | -4.313  | 0.17  | 0.30  | 0.23  |
| 162 | [Zn]c1cc(c(cc1C(=O)O)C(=O)O)C(=O)O%10%20%30%49                                                                                                                                                 | -0.51 | + | - | + | -2.536  | 9.420  | -4.313  | 0.17  | 0.30  | 0.23  |
| 163 | [Zn]C12=CC=CC=C1NN=N2^O=C(C1=CC=C(C(O)=O)S1)O%10%20%30%49                                                                                                                                      | 0.19  | - | # | - | -4.084  | 2.667  | -11.101 | 0.11  | 0.05  | -0.08 |
| 164 | [Cu]OC1=C(C(O)=O)C=CC=C1C(O)=O%10%20%30%49                                                                                                                                                     | 0.34  | * | + | # | -11.131 | -2.012 | -6.995  | -0.17 | -0.13 | 0.11  |
| 165 | [Yb]O=C(C1=CC(C2=CC=C(C(O)=O)C=C2)=CC(C(O)=O)=C1)O%10%20%30%49                                                                                                                                 | -0.15 | * | # | - | -6.095  | -2.731 | -12.132 | 0.03  | -0.15 | -0.13 |
| 166 | [Co]c1[nH]c(c-2ncnc2n1)N^CC(=O)O%11%20%30%49                                                                                                                                                   | 0.11  | # | # | * | -4.851  | -0.531 | -5.094  | 0.08  | -0.07 | 0.20  |
| 167 | [Zn]c1cc(ccc1C(=O)O)C(=O)O^C1CN2CCN1CC2%13%21%30%49                                                                                                                                            | 0.31  | - | * | - | 2.820   | 13.996 | -1.107  | 0.38  | 0.47  | 0.38  |
| 168 | [Cu]O=C(C1=CC(C(O)=O)=CC(NC2=NC(NC3=CC(C(O)=O)=CC(C(O)=O)=C3)=NC(NC4=CC(C(O)=O)=CC(C(O)=O)=C4)=N2)=C1)O%11%21%30%49                                                                            | 0.71  | + | * | # | 16.033  | 23.471 | 4.076   | 0.90  | 0.82  | 0.62  |
| 169 | [In]O=C(C1=CC(C(O)=O)=CC(C(O)=O)=C1)O%10%20%30%49                                                                                                                                              | 0.56  | + | # | + | -6.382  | 1.854  | -6.140  | 0.02  | 0.02  | 0.15  |
| 170 | [In]O=C(C1=CC(C(O)=O)=CC(C(O)=O)=C1)O%10%20%30%49                                                                                                                                              | 0.39  | - | - | + | -6.382  | 1.854  | -6.140  | 0.02  | 0.02  | 0.15  |
| 171 | [Cu]O=C(O)C1=CC=C(C2=NC(C3=CC=C(C=C3)C(O)=O)=NC(C4=CC=C(C=C4)C(O)=O)=N2)C=C1%16%22%30%49                                                                                                       | 0.63  | + | * | * | 2.387   | 9.402  | -2.224  | 0.36  | 0.30  | 0.33  |
| 172 | [Zn]O=C(C1=CC=C(C2=CC=C(C(O)=O)C=C2)C=C1)O%13%21%30%49                                                                                                                                         | 0.25  | * | + | + | -2.454  | 4.683  | -2.323  | 0.17  | 0.12  | 0.33  |
| 173 | [Zn]c1cc(ccc1C(=O)O)C(=O)O^C1CN2CCN1CC2%12%22%30%49                                                                                                                                            | 0.27  | - | + | # | -1.345  | 11.199 | 0.472   | 0.22  | 0.37  | 0.45  |
| 174 | [Ni]c1cc(ccc1C(=O)O)C(=O)O^C1CN2CCN1CC2%13%22%30%49                                                                                                                                            | 0.34  | * | # | * | -5.518  | 6.411  | -4.439  | 0.05  | 0.19  | 0.23  |
| 175 | [Cu]c1cc(ccc1C(=O)O)C(=O)O^C1CN2CCN1CC2%12%22%30%49                                                                                                                                            | 0.16  | - | + | - | -2.441  | 9.421  | -1.127  | 0.17  | 0.30  | 0.38  |
| 176 | [Co]c1cc(ccc1C(=O)O)C(=O)O^C1CN2CCN1CC2%13%22%30%49                                                                                                                                            | 0.01  | - | - | # | -4.825  | 7.402  | -0.491  | 0.08  | 0.22  | 0.41  |
| 177 | [Yb]OC(C(C=C1)=CC=C1C2=CC(C3=CC(C4=CC(C5=CC=C(C(O)=O)C=C5)=CC(C6=CC=C(C(O)=O)C=C6)=CC(C7=CC(C8=CC(C(O)=O)=CC=C8)=CC(C9=CC=C(C(O)=O)C=C9)=C7)=C3)=CC(C%10=CC=C(C(O)=O)C=C%10)=C2)=O%13%21%30%49 | 0.27  | + | # | # | -5.743  | 3.224  | -4.865  | 0.04  | 0.07  | 0.21  |

|     |                                                                                                                                      |       |         |   |   |        |        |        |      |      |      |
|-----|--------------------------------------------------------------------------------------------------------------------------------------|-------|---------|---|---|--------|--------|--------|------|------|------|
| 178 | [Cu]OC(C1=CC(C2=C(C=C(C1)C=C3)C3=C(C4=C(C=CC(C1)=C5)C5=C(C6=CC(C(O)=O)=CC(C(O)=O)=C6)C=C4OCC)C(OCC)=C2)=CC(C(O)=O)=C1)=O%12%20%35%49 | 1.10  | +       | + | # | 24.943 | 29.765 | 9.547  | 1.25 | 1.06 | 0.87 |
| 179 | [Cu]OC(C1=CC(C#CC#CC2=CC(C(O)=O)=CC(C(O)=O)=C2)=CC(C(O)=O)=C1)=O%14%21%35%49                                                         | 1.35  | -       | + | * | 26.410 | 36.961 | 23.245 | 1.31 | 1.32 | 1.51 |
| 180 | [Cu]OC(C1=CC(C(O)=O)=CC(N2C(C(C=C(C(N(C3=CC(C(O)=O)=CC(C(O)=O)=C3)C4=O)=O)C4=C5)=C5C2=O)=O)=C1)=O%13%21%39%49                        | 1.24  | -       | - | - | 17.990 | 30.425 | 8.143  | 0.98 | 1.08 | 0.81 |
| 181 | [Cu]OC(C1=CC(C(O)=O)=CC(N2C(C(C=C(C(N(C3=CC(C(O)=O)=CC(C(O)=O)=C3)C4=O)=O)C4=C5)=C5C2=O)=O)=C1)=O%13%21%30%49                        | 0.56  | #       | + | - | 1.752  | 9.965  | -3.453 | 0.34 | 0.32 | 0.27 |
| 182 | [Cu]OC(C1=CC(C(O)=O)=CC(N2C(C(C=C(C(N(C3=CC(C(O)=O)=CC(C(O)=O)=C3)C4=O)=O)C4=C5)=C5C2=O)=O)=C1)=O%13%21%30%49                        | -0.19 | -       | + | + | 1.752  | 9.965  | -3.453 | 0.34 | 0.32 | 0.27 |
| 183 | [Cu]OC(C1=CC(C#CC#CC2=CC(C#CC#CC3=CC(C(O)=O)=CC(C(O)=O)=C3)=CC(C#CC#CC4=CC(C(O)=O)=CC(C(O)=O)=C4)=C2)=CC(C(O)=O)=C1)=O%17%22%30%49   | 0.04  | Outlier |   |   |        |        |        |      |      |      |
| 184 | [Zn]Cc1[nH]nnn1%11%20%30%49                                                                                                          | 0.49  | *       | - | - | -6.087 | 9.723  | -4.383 | 0.03 | 0.31 | 0.23 |
| 185 | [Zn]O=C(C1=CC=C2C=C(C(O)=O)C=CC2=C1)O%12%20%30%49                                                                                    | 0.25  | -       | # | # | -1.033 | 7.162  | -1.177 | 0.23 | 0.22 | 0.38 |
| 186 | [Zn]O=C(C1=CC=C2C=C(C(O)=O)C=CC2=C1)O%12%20%49                                                                                       | 1.16  | #       | + | - | 20.963 | 19.605 | 9.912  | 1.10 | 0.68 | 0.89 |
| 187 | [Zn]O=C(C1=CC=C2C=C(C(O)=O)C=CC2=C1)O%12%20%35%49                                                                                    | 1.07  | +       | # | - | 17.213 | 27.320 | 15.807 | 0.95 | 0.97 | 1.16 |
| 188 | [Zn]O=C(C1=CC([N](O)=O)=C2C=C(C(O)=O)C=C([N](O)=O)C2=C1)O%11%20%30%49                                                                | -0.06 | -       | + | - | 10.990 | 16.414 | 0.806  | 0.70 | 0.56 | 0.47 |
| 189 | [Zn]O=C(C1=CC([N](O)=O)=C2C=C(C(O)=O)C=C([N](O)=O)C2=C1)O%11%20%30%49                                                                | 1.04  | +       | # | - | 10.990 | 16.414 | 0.806  | 0.70 | 0.56 | 0.47 |
| 190 | [Zn]O=C(C1=CC([N](O)=O)=C2C=C(C(O)=O)C=C([N](O)=O)C2=C1)O%11%20%30%49                                                                | 0.86  | +       | + | - | 10.990 | 16.414 | 0.806  | 0.70 | 0.56 | 0.47 |
| 191 | [Cu]O=C(C1=CC=C(C2=CC(C3=CC=C(C(O)=O)C=C3)=C(C#CC4=CC(C(O)=O)=CC(C(O)=O)=C4)=C2)C=C1)O%16%22%30%49                                   | 0.28  | *       | * | - | 4.541  | 14.615 | 2.285  | 0.45 | 0.49 | 0.54 |
| 192 | [Cu]O=C(C1=CC=C(C2=CC(C3=CC=C(C(O)=O)C=C3)=C(C#CC4=CC(C(O)=O)=CC(C(O)=O)=C4)=C2)C=C1)O%16%22%37%49                                   | 1.05  | +       | * | * | 24.680 | 22.274 | 12.998 | 1.24 | 0.78 | 1.03 |
| 193 | [Cu]O=C(C1=CC(C(O)=O)=CC(C2=NNN=N2)=C1)O%14%21%30%49                                                                                 | 0.40  | *       | - | * | 3.470  | 8.644  | -1.835 | 0.41 | 0.27 | 0.35 |

|     |                                                                                                     |      |   |   |   |        |        |        |      |      |      |
|-----|-----------------------------------------------------------------------------------------------------|------|---|---|---|--------|--------|--------|------|------|------|
| 194 | [Cu]O=C(O)C1=CC(OCC2=CC(C(O)=O)=CC(C(O)=O)=C2)=CC(C(O)=O)=C1%12%21%30%49                            | 0.74 | # | * | + | 1.956  | 17.096 | 0.241  | 0.35 | 0.58 | 0.44 |
| 195 | [Cu]O=C(O)C1=CC(C2=CC(CC3=C4C=CC(C5=CC(C(O)=O)=CC(C(O)=O)=C5)=C3)=C4C=C2)=CC(C(O)=O)=C1%13%21%30%49 | 0.57 | + | - | - | 0.210  | 6.010  | -0.112 | 0.28 | 0.17 | 0.43 |
| 196 | [Cu]O=C(O)C1=CC(C2=NC=C(C3=CC(C(O)=O)=CC(C(O)=O)=C3)C=C2)=CC(C(O)=O)=C1%14%21%30%49                 | 0.58 | * | + | * | 11.492 | 26.904 | 3.879  | 0.72 | 0.95 | 0.61 |
| 197 | [In]c1c(cc(cc1C(=O)O)C(=O)O)C(=O)O%11%20%30%49                                                      | 0.44 | - | - | * | 4.577  | 13.782 | -0.536 | 0.45 | 0.46 | 0.41 |
| 198 | [In][Ni]c1c(cc(cc1C(=O)O)C(=O)O)C(=O)O%11%20%30%49                                                  | 0.44 | + | # | # | 10.540 | 15.755 | 3.799  | 0.69 | 0.54 | 0.61 |
| 199 | [In][Co]c1c(cc(cc1C(=O)O)C(=O)O)C(=O)O%11%20%30%49                                                  | 0.54 | # | # | - | 11.233 | 16.746 | 7.747  | 0.71 | 0.57 | 0.79 |
| 200 | [In][Mn]c1c(cc(cc1C(=O)O)C(=O)O)C(=O)O%11%20%30%49                                                  | 0.51 | - | * | - | 10.485 | 15.926 | 0.642  | 0.68 | 0.54 | 0.46 |
| 201 | [In][Mg]c1c(cc(cc1C(=O)O)C(=O)O)C(=O)O%12%20%30%49                                                  | 0.71 | # | + | + | 15.265 | 20.880 | 8.335  | 0.87 | 0.73 | 0.82 |
| 202 | [Ga][Mg]c1c(cc(cc1C(=O)O)C(=O)O)C(=O)O%11%20%30%49                                                  | 0.55 | # | # | # | 5.344  | 14.267 | 2.376  | 0.48 | 0.48 | 0.54 |
| 203 | [Fe][Mg]c1c(cc(cc1C(=O)O)C(=O)O)C(=O)O%12%21%30%49                                                  | 0.75 | # | # | * | 12.805 | 19.188 | 5.800  | 0.77 | 0.66 | 0.70 |
| 204 | [V][Mg]c1c(cc(cc1C(=O)O)C(=O)O)C(=O)O%11%20%30%49                                                   | 0.56 | - | # | * | 11.310 | 25.597 | 9.544  | 0.72 | 0.90 | 0.87 |
| 205 | [Sc][Mg]c1c(cc(cc1C(=O)O)C(=O)O)C(=O)O%11%20%30%49                                                  | 0.44 | # | + | # | 9.266  | 17.821 | 0.330  | 0.64 | 0.61 | 0.45 |
| 206 | [In]c1c(cc(cc1C(=O)O)C(=O)O)C(=O)O%11%20%30%49                                                      | 0.69 | # | - | - | 4.577  | 13.782 | -0.536 | 0.45 | 0.46 | 0.41 |
| 207 | [In][Ni]c1c(cc(cc1C(=O)O)C(=O)O)C(=O)O%11%20%30%49                                                  | 0.65 | # | # | * | 10.540 | 15.755 | 3.799  | 0.69 | 0.54 | 0.61 |
| 208 | [In][Co]c1c(cc(cc1C(=O)O)C(=O)O)C(=O)O%11%20%30%49                                                  | 0.79 | # | + | - | 11.233 | 16.746 | 7.747  | 0.71 | 0.57 | 0.79 |
| 209 | [In][Mn]c1c(cc(cc1C(=O)O)C(=O)O)C(=O)O%11%20%30%49                                                  | 0.75 | # | * | # | 10.485 | 15.926 | 0.642  | 0.68 | 0.54 | 0.46 |
| 210 | [In][Mg]c1c(cc(cc1C(=O)O)C(=O)O)C(=O)O%12%20%30%49                                                  | 0.93 | # | - | + | 15.265 | 20.880 | 8.335  | 0.87 | 0.73 | 0.82 |
| 211 | [Ga][Mg]c1c(cc(cc1C(=O)O)C(=O)O)C(=O)O%11%20%30%49                                                  | 0.78 | * | * | - | 5.344  | 14.267 | 2.376  | 0.48 | 0.48 | 0.54 |
| 212 | [Fe][Mg]c1c(cc(cc1C(=O)O)C(=O)O)C(=O)O%12%21%30%49                                                  | 0.97 | - | - | * | 12.805 | 19.188 | 5.800  | 0.77 | 0.66 | 0.70 |



|     |                                                                                                      |      |   |   |   |        |        |        |      |      |      |
|-----|------------------------------------------------------------------------------------------------------|------|---|---|---|--------|--------|--------|------|------|------|
| 213 | [V][Mg]c1c(cc(cc1C(=O)O)C(=O)O)C(=O)O%11%20%30%49                                                    | 0.84 | + | + | - | 11.310 | 25.597 | 9.544  | 0.72 | 0.90 | 0.87 |
| 214 | [Sc][Mg]c1c(cc(cc1C(=O)O)C(=O)O)C(=O)O%11%20%30%49                                                   | 0.74 | + | + | * | 9.266  | 17.821 | 0.330  | 0.64 | 0.61 | 0.45 |
| 215 | [In][Co]c1c(cc(cc1C(=O)O)C(=O)O)C(=O)O^O=C(C1=CC=C(C(O)=O)C=C1)O%11%20%30%49                         | 0.33 | * | - | + | 12.502 | 20.402 | 5.085  | 0.76 | 0.71 | 0.67 |
| 216 | [In][Co]c1c(cc(cc1C(=O)O)C(=O)O)C(=O)O^O=C(C1=CC=C(C(O)=O)C=C1)O%11%20%30%49                         | 0.61 | - | * | * | 12.502 | 20.402 | 5.085  | 0.76 | 0.71 | 0.67 |
| 217 | [In][Nd]O=C(C1=CC=C(C2=CC(C3=CC=C(C(O)=O)C=C3)=CC(C4=CC=C(C(O)=O)C=C4)=C2)C=C1)O%10%20%30%49         | 0.23 | * | + | - | -3.913 | 1.952  | -6.050 | 0.12 | 0.02 | 0.15 |
| 218 | [In]O=C(C1=CC=C(C2=CC=C(C(O)=O)C=C2)C=C1)O%11%20%30%49                                               | 0.31 | * | * | # | -4.066 | 1.291  | -5.400 | 0.11 | 0.00 | 0.18 |
| 219 | [Mg]O=C(C1=CC=C(C2=C(C)C=C(C3=CC=C(C(O)=O)C(O)=C3)C=C2)C=C1)O%14%21%30%49                            | 0.47 | # | - | + | 3.771  | 16.482 | -3.467 | 0.42 | 0.56 | 0.27 |
| 220 | [Mg]O=C(C1=CC=C(C2=C(N)C=C(C3=CC=C(C(O)=O)C(O)=C3)C=C2)C=C1)O%14%21%30%49                            | 0.50 | # | # | * | 2.759  | 15.575 | -4.345 | 0.38 | 0.53 | 0.23 |
| 221 | [Mg]O=C(C1=CC=C(C2=C(CNC(OC(C)(C)C)=O)C=C(C3=CC=C(C(O)=O)C(O)=C3)C=C2)C=C1)O%13%21%30%49             | 0.32 | - | * | + | 9.183  | 19.681 | -0.499 | 0.63 | 0.68 | 0.41 |
| 222 | [Mg]O=C(C1=CC=C(C2=C(CN)C=C(C3=CC=C(C(O)=O)C(O)=C3)C=C2)C=C1)O%13%21%30%49                           | 0.51 | - | - | + | 4.768  | 14.834 | -3.527 | 0.46 | 0.50 | 0.27 |
| 223 | [Mg]O=C(C1=CC=C(C2=C(CN(C)C(OC(C)(C)C)=O)C=C(C3=CC=C(C(O)=O)C(O)=C3)C=C2)C=C1)O%13%21%30%49          | 0.28 | + | + | - | 6.608  | 18.854 | -3.122 | 0.53 | 0.65 | 0.29 |
| 224 | [Mg]O=C(C1=CC=C(C2=C(CNC)C=C(C3=CC=C(C(O)=O)C(O)=C3)C=C2)C=C1)O%13%21%30%49                          | 0.46 | # | - | * | 7.888  | 17.115 | -1.476 | 0.58 | 0.59 | 0.36 |
| 225 | [Al]c1cc(ccc1C(=O)O)C(=O)O%12%20%34%49                                                               | 0.83 | - | * | + | 8.860  | 22.809 | 14.568 | 0.62 | 0.80 | 1.11 |
| 226 | [Al]c1cc(ccc1C(=O)O)C(=O)O%12%20%35%49                                                               | 1.02 | - | * | + | 19.410 | 26.790 | 10.684 | 1.03 | 0.95 | 0.93 |
| 227 | [Al]c1cc(ccc1C(=O)O)C(=O)O%12%20%30%49                                                               | 0.00 | + | * | + | 1.163  | 6.633  | -6.300 | 0.32 | 0.20 | 0.14 |
| 228 | [Zr]O=P(CC1=CC=C(C2=NC(C3=CC=C(CP(O)(O)=O)C=C3)=NC(C4=CC=C(CP(O)(O)=O)C=C4)=N2)C=C1)(O)O%10%20%31%49 | 0.53 | - | # | + | 3.828  | 14.201 | 1.362  | 0.42 | 0.48 | 0.50 |
| 229 | [Zr]O=P(CC1=CC=C(C2=NC(C3=CC=C(CP(O)(O)=O)C=C3)=NC(C4=CC=C(CP(O)(O)=O)C=C4)=N2)C=C1)(O)O%10%20%31%49 | 0.49 | + | + | # | 3.828  | 14.201 | 1.362  | 0.42 | 0.48 | 0.50 |

|     |                                                                                                                                           |       |   |   |   |        |        |        |      |      |      |
|-----|-------------------------------------------------------------------------------------------------------------------------------------------|-------|---|---|---|--------|--------|--------|------|------|------|
| 230 | [Co]NC1=NC=NC2=C1NC=N2^CC(O)=O%11%20%30%49                                                                                                | 0.82  | + | + | - | 3.678  | 8.155  | 1.225  | 0.42 | 0.25 | 0.49 |
| 231 | [Co]NC1=NC=NC2=C1NC=N2^CC(O)=O%11%20%30%49                                                                                                | 0.61  | + | - | - | 3.678  | 8.155  | 1.225  | 0.42 | 0.25 | 0.49 |
| 232 | [Co]NC1=NC=NC2=C1NC=N2^O=C(O)CC%11%20%30%49                                                                                               | 0.65  | * | * | - | 3.493  | 6.738  | 2.126  | 0.41 | 0.20 | 0.53 |
| 233 | [Co]NC1=NC=NC2=C1NC=N2^O=C(O)CC%11%20%30%49                                                                                               | 0.50  | + | - | - | 3.493  | 6.738  | 2.126  | 0.41 | 0.20 | 0.53 |
| 234 | [Co]NC1=NC=NC2=C1NC=N2^O=C(O)CCC%10%20%30%49                                                                                              | 0.43  | # | - | # | 0.087  | 6.580  | -3.860 | 0.27 | 0.19 | 0.25 |
| 235 | [Co]NC1=NC=NC2=C1NC=N2^O=C(O)CCC%10%20%30%49                                                                                              | 0.30  | * | * | * | 0.087  | 6.580  | -3.860 | 0.27 | 0.19 | 0.25 |
| 236 | [Co]NC1=NC=NC2=C1NC=N2^O=C(O)CCCC%10%20%30%49                                                                                             | 0.30  | + | + | - | 0.622  | 6.707  | -3.531 | 0.29 | 0.20 | 0.27 |
| 237 | [Co]NC1=NC=NC2=C1NC=N2^O=C(O)CCCC%10%20%30%49                                                                                             | 0.14  | + | - | * | 0.622  | 6.707  | -3.531 | 0.29 | 0.20 | 0.27 |
| 238 | [Zn]O=C(C1=CC(NC(C)=O)=C(C2=C(NC(C)=O)C=C(C(O)=O)C=C2)C=C1)O%11%20%30%49                                                                  | 0.67  | + | - | * | 1.568  | 9.732  | -1.374 | 0.33 | 0.31 | 0.37 |
| 239 | [Zn]O=C(C1=CC(NC(C)=O)=C(C2=C(NC(C)=O)C=C(C(O)=O)C=C2)C=C1)O%11%20%30%49                                                                  | 0.46  | - | # | # | 1.568  | 9.732  | -1.374 | 0.33 | 0.31 | 0.37 |
| 240 | [Zn]O=C(C1=CC(NC(C)=O)=C(C2=C(NC(C)=O)C=C(C(O)=O)C=C2)C=C1)O%11%20%30%49                                                                  | 0.31  | + | * | * | 1.568  | 9.732  | -1.374 | 0.33 | 0.31 | 0.37 |
| 241 | [Zn]O=C(C1=CC(NC(CCC)=O)=C(C2=C(NC(CCC)=O)C=C(C(O)=O)C=C2)C=C1)O%11%20%30%49                                                              | 0.24  | # | # | * | 3.708  | 10.243 | -0.058 | 0.42 | 0.33 | 0.43 |
| 242 | [Cu]O=C(C1=CC(C(O)=O)=CC(OCC(COC2=CC(C(O)=O)=CC(C(O)=O)=C2)(COC3=CC(C(O)=O)=CC(C(O)=O)=C3)COC4=CC(C(O)=O)=CC(C(O)=O)=C4)=C1)O%12%21%30%49 | 0.67  | * | * | # | 8.541  | 23.640 | 5.531  | 0.61 | 0.83 | 0.69 |
| 243 | [Zn]O=C(C1=CC=C(C2=CC=C(C(O)=O)C=C2CS(C)(=O)=O)C=C1)O%12%21%30%47                                                                         | 1.27  | - | - | + | 18.734 | 26.788 | 12.736 | 1.01 | 0.95 | 1.02 |
| 244 | [Zn]O=C(C1=CC=C(C2=CC=C(C(O)=O)C=C2CS(C)(=O)=O)C=C1)O%12%21%30%49                                                                         | 0.15  | + | # | - | 6.378  | 14.936 | 1.648  | 0.52 | 0.50 | 0.51 |
| 245 | [Zn]O=C(C1=CC=C(C2=CC=C(C(O)=O)C=C2CS(C)(=O)=O)C=C1)O%12%21%31%49                                                                         | 0.81  | - | + | # | 15.959 | 24.837 | 14.980 | 0.90 | 0.87 | 1.12 |
| 246 | [Zn]O=C(C1=CC=C(C2=CC=C(C(O)=O)C=C2CS(CCC)(=O)=O)C=C1)O%12%20%30%47                                                                       | 1.19  | + | - | # | 18.083 | 24.522 | 13.805 | 0.98 | 0.86 | 1.07 |
| 247 | [Zn]O=C(C1=CC=C(C2=CC=C(C(O)=O)C=C2CS(CCC)(=O)=O)C=C1)O%12%20%30%49                                                                       | -0.01 | - | - | # | 5.727  | 12.670 | 2.717  | 0.50 | 0.42 | 0.56 |

|     |                                                                                                                              |       |         |   |   |         |         |         |       |       |       |
|-----|------------------------------------------------------------------------------------------------------------------------------|-------|---------|---|---|---------|---------|---------|-------|-------|-------|
| 248 | [Zn]O=C(C1=CC=C(C2=CC=C(C(O)=O)C=C2CS(CCC)(=O)=O)C=C1)O%12%20%31%49                                                          | 0.78  | +       | - | - | 15.327  | 22.425  | 8.013   | 0.87  | 0.78  | 0.80  |
| 249 | [Zr]c1cc(ccc1C(=O)O)C(=O)O%10%20%30%49                                                                                       | -0.80 | -       | + | # | -17.581 | -5.695  | -18.803 | -0.42 | -0.26 | -0.44 |
| 250 | [Zr]O=C(C1=CC=C(C(O)=O)C=C1N)O%10%20%30%49                                                                                   | -0.55 | -       | * | - | -22.712 | -8.884  | -20.250 | -0.62 | -0.38 | -0.50 |
| 251 | [Zr]O=C(C1=CC=C(C(O)=O)C=C1F)O%10%20%30%49                                                                                   | -1.00 | -       | + | + | -22.131 | -16.443 | -24.144 | -0.60 | -0.66 | -0.68 |
| 252 | [Zr]O=C(C1=CC=C2C=C(C(O)=O)C=CC2=C1)O%10%20%30%49                                                                            | -0.77 | -       | + | # | -21.850 | -5.829  | -16.784 | -0.59 | -0.27 | -0.34 |
| 253 | [Zr]O=C(C1=CC=C(C2=CC=C(C(O)=O)C=C2)C=C1)O%11%20%30%49                                                                       | -0.74 | -       | + | + | -18.298 | -6.000  | -15.612 | -0.45 | -0.27 | -0.29 |
| 254 | [Zr]O=C(C1=CC(C)=C(C2=CC=C(C(O)=O)C=C2)C=C1)O%10%20%30%49                                                                    | -0.68 | -       | - | # | -21.202 | 1.174   | -16.658 | -0.56 | -0.01 | -0.34 |
| 255 | [Zr]O=C(C1=CC=C(N=NC2=CC=C(C(O)=O)C(C1)=C2)C=C1)O%11%20%30%49                                                                | -1.00 | Outlier |   |   |         |         |         |       |       |       |
| 256 | [Cu]FC(F)(F)C(C1=CC=C(C(C(O)=O)=C1)C(O)=O)(C2=CC=C(C(C(O)=O)=C2)C(O)=O)C(F)(F)F%10%20%30%49                                  | 0.32  | +       | - | + | -2.587  | 18.580  | -3.990  | 0.17  | 0.64  | 0.25  |
| 257 | [Cu]O=C(C1=CC(N=N/C2=CC(C(O)=O)=CC(C(O)=O)=C2)=CC(C(O)=O)=C1)O%14%21%30%49                                                   | 0.94  | Outlier |   |   |         |         |         |       |       |       |
| 258 | [Cu]O=C(C1=CC(N=N/C2=CC(C(O)=O)=CC(C(O)=O)=C2)=CC(C(O)=O)=C1)O%14%21%30%49                                                   | 0.26  | #       | + | - | 8.494   | 18.580  | 2.309   | 0.60  | 0.64  | 0.54  |
| 259 | [Zn]O=C(C1=CC=C(N(C2=CC=C(C(O)=O)C=C2)C3=CC=C(C4=CC=C(N(C5=CC=C(C(O)=O)C=C5)C6=CC=C(C(O)=O)C=C6)C=C4)C=C3)C=C1)O%11%20%30%49 | 0.06  | -       | + | + | -12.270 | -8.122  | -16.877 | -0.21 | -0.35 | -0.35 |
| 260 | [Zn]O=C(C1=CC=C(N(C2=CC=C(C(O)=O)C=C2)C3=CC=C(C4=CC=C(N(C5=CC=C(C(O)=O)C=C5)C6=CC=C(C(O)=O)C=C6)C=C4)C=C3)C=C1)O%11%20%30%49 | -0.68 | +       | + | + | -12.270 | -8.122  | -16.877 | -0.21 | -0.35 | -0.35 |



**Table S3.** Percentage of identity for three random splits

|         | Set                | Split 1 | Split 2 | Split 3 |
|---------|--------------------|---------|---------|---------|
| Split 1 | Total              | 100     | 28.7    | 26.4    |
|         | Training           | 100     | 33.3    | 33.8    |
|         | Invisible training | 100     | 30.1    | 26.3    |
|         | Calibration        | 100     | 29.4    | 19.4    |
|         | Validation         | 100     | 18.6    | 22.2    |
| Split 2 | Total              |         | 100     | 23.6    |
|         | Training           |         | 100     | 29.7    |
|         | Invisible training |         | 100     | 22.9    |
|         | Calibration        |         | 100     | 21.1    |
|         | Validation         |         | 100     | 18.9    |
| Split 3 | Total              |         |         | 100     |
|         | Training           |         |         | 100     |
|         | Invisible training |         |         | 100     |
|         | Calibration        |         |         | 100     |
|         | Validation         |         |         | 100     |

**Table S4.** Examples of quasi-SMILES and the relevant CO<sub>2</sub> uptake capacity

| No. | MOF           | BET  | Pore-volume | P (bar) | T(K) | Metal     | Organic linker                                                                       | Quasi-SMILES                                                                                                           | CO <sub>2</sub> uptake capacity |
|-----|---------------|------|-------------|---------|------|-----------|--------------------------------------------------------------------------------------|------------------------------------------------------------------------------------------------------------------------|---------------------------------|
| 5   | IRMOF-3       | 1568 | 1.07        | 35      | 298  | Zn        | 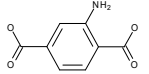   | <chem>[Zn]c1cc(cc1C(=O)O)N)C(=O)O%12%21%36%49</chem>                                                                   | 18.70                           |
| 16  | MOF-177       | 4750 | 1.89        | 20      | 298  | Zn        |    | <chem>[Zn]C1=CC(=CC=C1C2=CC(=CC(=C2)C3=CC=C(C=C3)C(=O)O)C4=CC=C(C=C4)C(=O)O)C(=O)O%17%22%33%49</chem>                  | 28.00                           |
| 18  | MOF-200       | 4530 | 3.59        | 50      | 298  | Zn        |   | <chem>[Zn]c1cc(ccc1c2ccc(cc2)C(=O)O)c3cc(cc(c3)c4ccc(cc4)c5cc(cc5)C(=O)O)c6ccc(cc6)c7ccc(cc7)C(=O)O%17%24%39%49</chem> | 54.5                            |
| 29  | SIFSIX-2-Cu-i | 735  | 0.26        | 0.01    | 298  | Cu and Si |  | <chem>[Cu][Si]c1cnccc1C#Cc2ccncc2%11%20%30%49</chem>                                                                   | 0.19                            |
| 59  | NOTT-125      | 2471 | 1.1         | 1       | 298  | Cu        |  | <chem>[Cu]O=C(NC1=CC(C(O)=O)=CC(C(O)=O)=C1)C(NC2=C(C(C(O)=O)=CC(C(O)=O)=C2)=O%13%21%30%49</chem>                       | 4.13                            |



**Table S5.** The mathematical equations of various statistical criteria for predictive potential of the QSPR models

| Criterion of the predictive potential                                                                                                                         | Reference |
|---------------------------------------------------------------------------------------------------------------------------------------------------------------|-----------|
| $R^2 = 1 - \frac{\sum (Y_{obs} - Y_{prd})^2}{\sum (Y_{obs} - \bar{Y})^2}$                                                                                     | [S86]     |
| $Q^2 = 1 - \frac{\sum (Y_{prd} - Y_{obs})^2}{\sum (Y_{obs} - \bar{Y}_{train})^2}$                                                                             | [S87]     |
| $Q_{F1}^2 = 1 - \frac{\sum (Y_{per(test)} - Y_{obs(test)})^2}{\sum (Y_{obs(test)} - \bar{Y}_{train})^2}$                                                      | [S88]     |
| $Q_{F2}^2 = 1 - \frac{\sum (Y_{prd(test)} - Y_{obs(test)})^2}{\sum (Y_{obs(test)} - \bar{Y}_{ext})^2}$                                                        | [S88]     |
| $Q_{F3}^2 = 1 - \frac{\sum (Y_{prd(test)} - Y_{obs(test)})^2 / n_{ext}}{\sum (Y_{obs(test)} - \bar{Y}_{train})^2 / n_{train}}$                                | [S88]     |
| $r_m^2 = r^2 \times (1 - \sqrt{r^2 - r_0^2})$                                                                                                                 | [S86]     |
| $2 \sum (X - \bar{X})(Y - \bar{Y})$                                                                                                                           | [S89]     |
| $CCC = \frac{\sum (X - \bar{X})^2 + \sum (Y - \bar{Y})^2 + n((\bar{X} - \bar{Y})^2)}{\sum (X - \bar{X})^2 + \sum (Y - \bar{Y})^2 + n((\bar{X} - \bar{Y})^2)}$ |           |
| $C_{R_p^2} = R \sqrt{(R^2 - R_r^2)}$                                                                                                                          | [S86]     |
| $MAE = \frac{1}{n} \times \sum  Y_{obs} - Y_{prd} $                                                                                                           | [S86]     |



**Table S6.** The calculation results of DCW(3, 14) of attributes for [Cu]c1c(cc(cc1C(=O)O)C(=O)O)C(=O)O%12%20%30%49, DCW= 4.856, split 1 and TF2

| AK          | DCW(AK) | N <sub>TRN</sub> | N <sub>iTRN</sub> | N <sub>CAL</sub> |
|-------------|---------|------------------|-------------------|------------------|
| [.....      | 0.9441  | 81               | 79                | 49               |
| Cu.....     | 0.4246  | 23               | 20                | 14               |
| [.....      | 0.9441  | 81               | 79                | 49               |
| c.....      | 0.006   | 27               | 37                | 23               |
| 1.....      | 0.139   | 78               | 79                | 49               |
| c.....      | 0.006   | 27               | 37                | 23               |
| (.....      | -0.6727 | 80               | 78                | 49               |
| c.....      | 0.006   | 27               | 37                | 23               |
| c.....      | 0.006   | 27               | 37                | 23               |
| (.....      | -0.6727 | 80               | 78                | 49               |
| c.....      | 0.006   | 27               | 37                | 23               |
| c.....      | 0.006   | 27               | 37                | 23               |
| 1.....      | 0.139   | 78               | 79                | 49               |
| C.....      | 0.3737  | 81               | 79                | 49               |
| (.....      | -0.6727 | 80               | 78                | 49               |
| =.....      | 0.2556  | 81               | 78                | 49               |
| O.....      | 0.3118  | 75               | 74                | 47               |
| (.....      | -0.6727 | 80               | 78                | 49               |
| O.....      | 0.3118  | 75               | 74                | 47               |
| (.....      | -0.6727 | 80               | 78                | 49               |
| C.....      | 0.3737  | 81               | 79                | 49               |
| (.....      | -0.6727 | 80               | 78                | 49               |
| =.....      | 0.2556  | 81               | 78                | 49               |
| O.....      | 0.3118  | 75               | 74                | 47               |
| (.....      | -0.6727 | 80               | 78                | 49               |
| O.....      | 0.3118  | 75               | 74                | 47               |
| (.....      | -0.6727 | 80               | 78                | 49               |
| C.....      | 0.3737  | 81               | 79                | 49               |
| (.....      | -0.6727 | 80               | 78                | 49               |
| =.....      | 0.2556  | 81               | 78                | 49               |
| O.....      | 0.3118  | 75               | 74                | 47               |
| (.....      | -0.6727 | 80               | 78                | 49               |
| O.....      | 0.3118  | 75               | 74                | 47               |
| (.....      | -0.6727 | 80               | 78                | 49               |
| %12.....    | 0.4258  | 20               | 16                | 8                |
| %20.....    | -0.986  | 57               | 50                | 28               |
| %30.....    | -2.4445 | 64               | 55                | 37               |
| %49.....    | -3.2085 | 77               | 76                | 46               |
| [...Cu..... | 1.6081  | 23               | 20                | 14               |

|              |         |    |    |    |
|--------------|---------|----|----|----|
| [...Cu.....  | 1.6081  | 23 | 20 | 14 |
| c...[.....   | 0.0675  | 25 | 33 | 21 |
| c...1.....   | 0.0768  | 27 | 37 | 23 |
| c...1.....   | 0.0768  | 27 | 37 | 23 |
| c...(.....   | 0.9131  | 27 | 35 | 23 |
| c...(.....   | 0.9131  | 27 | 35 | 23 |
| c...c.....   | 0.2995  | 27 | 37 | 22 |
| c...(.....   | 0.9131  | 27 | 35 | 23 |
| c...(.....   | 0.9131  | 27 | 35 | 23 |
| c...c.....   | 0.2995  | 27 | 37 | 22 |
| c...1.....   | 0.0768  | 27 | 37 | 23 |
| C...1.....   | -1.1973 | 66 | 69 | 43 |
| C...(.....   | 0.2856  | 79 | 78 | 49 |
| =...(.....   | 0.1224  | 76 | 78 | 48 |
| O...=.....   | 0.6776  | 75 | 74 | 47 |
| O...(.....   | 0.4192  | 75 | 73 | 47 |
| O...(.....   | 0.4192  | 75 | 73 | 47 |
| O...(.....   | 0.4192  | 75 | 73 | 47 |
| C...(.....   | 0.2856  | 79 | 78 | 49 |
| C...(.....   | 0.2856  | 79 | 78 | 49 |
| =...(.....   | 0.1224  | 76 | 78 | 48 |
| O...=.....   | 0.6776  | 75 | 74 | 47 |
| O...(.....   | 0.4192  | 75 | 73 | 47 |
| O...(.....   | 0.4192  | 75 | 73 | 47 |
| O...(.....   | 0.4192  | 75 | 73 | 47 |
| C...(.....   | 0.2856  | 79 | 78 | 49 |
| C...(.....   | 0.2856  | 79 | 78 | 49 |
| =...(.....   | 0.1224  | 76 | 78 | 48 |
| O...=.....   | 0.6776  | 75 | 74 | 47 |
| O...(.....   | 0.4192  | 75 | 73 | 47 |
| O...(.....   | 0.4192  | 75 | 73 | 47 |
| O...%12..... | 2.2101  | 12 | 9  | 6  |
| %20.%12..... | 0.7037  | 14 | 11 | 4  |
| %30.%20..... | -1.3489 | 46 | 40 | 25 |
| %49.%30..... | -3.9033 | 60 | 52 | 34 |

---

**Table S7.** Correlation coefficient for training set ( $R_{TRN}^2$ ), invisible training set ( $R_{iTRN}^2$ ) and calibration set ( $R_{CAL}^2$ ) after several Y-randomization test for models based on TF<sub>2</sub>

|         | Split 1     |              |             | Split 2     |              |             | Split 3     |              |             |
|---------|-------------|--------------|-------------|-------------|--------------|-------------|-------------|--------------|-------------|
|         | $R_{TRN}^2$ | $R_{iTRN}^2$ | $R_{CAL}^2$ | $R_{TRN}^2$ | $R_{iTRN}^2$ | $R_{CAL}^2$ | $R_{TRN}^2$ | $R_{iTRN}^2$ | $R_{CAL}^2$ |
| 1       | 0.0039      | 0.0029       | 0.0806      | 0.0119      | 0.0723       | 0.0146      | 0.0009      | 0.0066       | 0.0000      |
| 2       | 0.0073      | 0.0024       | 0.0171      | 0.0052      | 0.0020       | 0.0044      | 0.0350      | 0.0074       | 0.0123      |
| 3       | 0.0014      | 0.0003       | 0.0204      | 0.0153      | 0.0291       | 0.0114      | 0.0170      | 0.0002       | 0.0045      |
| 4       | 0.0121      | 0.0050       | 0.0019      | 0.0133      | 0.0001       | 0.0013      | 0.0062      | 0.0315       | 0.0000      |
| 5       | 0.0015      | 0.0388       | 0.0124      | 0.0009      | 0.0000       | 0.1216      | 0.0046      | 0.0025       | 0.0050      |
| 6       | 0.0001      | 0.0008       | 0.0182      | 0.0320      | 0.0001       | 0.0004      | 0.0250      | 0.0000       | 0.0181      |
| 7       | 0.0541      | 0.0050       | 0.0006      | 0.0005      | 0.0102       | 0.0216      | 0.0229      | 0.0196       | 0.0035      |
| 8       | 0.0076      | 0.0051       | 0.0070      | 0.0219      | 0.0039       | 0.0000      | 0.0001      | 0.0006       | 0.0000      |
| 9       | 0.0079      | 0.0381       | 0.0718      | 0.0076      | 0.0048       | 0.0124      | 0.0006      | 0.0087       | 0.0090      |
| 10      | 0.0001      | 0.0061       | 0.0229      | 0.0086      | 0.0034       | 0.0173      | 0.0002      | 0.0159       | 0.0006      |
| Average | 0.0096      | 0.0104       | 0.0253      | 0.0117      | 0.0126       | 0.0205      | 0.0112      | 0.0093       | 0.0053      |

## References

- [S1] Z. Zhang, Y. Zhao, Q. Gong, Z. Li, J. Li, MOFs for CO<sub>2</sub> capture and separation from flue gas mixtures: the effect of multifunctional sites on their adsorption capacity and selectivity, *Chem. Commun.* 49(7) (2013) 653-661.
- [S2] S. Xiang, Y. He, Z. Zhang, H. Wu, W. Zhou, R. Krishna, B. Chen, Microporous metal-organic framework with potential for carbon dioxide capture at ambient conditions, *Nat. Commun.* 3(1) (2012) 1-9.
- [S3] J.A. Mason, T.M. McDonald, T.-H. Bae, J.E. Bachman, K. Sumida, J.J. Dutton, S.S. Kaye, J.R. Long, Application of a high-throughput analyzer in evaluating solid adsorbents for post-combustion carbon capture via multicomponent adsorption of CO<sub>2</sub>, N<sub>2</sub>, and H<sub>2</sub>O, *J. Am. Chem. Soc.* 137(14) (2015) 4787-4803.
- [S4] A.R. Millward, O.M. Yaghi, Metal-organic frameworks with exceptionally high capacity for storage of carbon dioxide at room temperature, *J. Am. Chem. Soc.* 127(51) (2005) 17998-17999.
- [S5] A.O.z.r. Yazaydin, R.Q. Snurr, T.-H. Park, K. Koh, J. Liu, M.D. LeVan, A.I. Benin, P. Jakubczak, M. Lanuza, D.B. Galloway, Screening of metal-organic frameworks for carbon dioxide capture from flue gas using a combined experimental and modeling approach, *J. Am. Chem. Soc.* 131(51) (2009) 18198-18199.
- [S6] S. Bourrelly, P.L. Llewellyn, C. Serre, F. Millange, T. Loiseau, G. Férey, Different adsorption behaviors of methane and carbon dioxide in the isotypic nanoporous metal terephthalates MIL-53 and MIL-47, *J. Am. Chem. Soc.* 127(39) (2005) 13519-13521.
- [S7] P.L. Llewellyn, S. Bourrelly, C. Serre, A. Vimont, M. Daturi, L. Hamon, G. De Weireld, J.-S. Chang, D.-Y. Hong, Y. Kyu Hwang, High uptakes of CO<sub>2</sub> and CH<sub>4</sub> in mesoporous metal-organic frameworks mil-100 and mil-101, *Langmuir* 24(14) (2008) 7245-7250.
- [S8] R. Babarao, J. Jiang, Molecular screening of metal-organic frameworks for CO<sub>2</sub> storage, *Langmuir* 24(12) (2008) 6270-6278.
- [S9] H. Furukawa, N. Ko, Y.B. Go, N. Aratani, S.B. Choi, E. Choi, A.Ö. Yazaydin, R.Q. Snurr, M. O'Keeffe, J. Kim, Ultrahigh porosity in metal-organic frameworks, *Science* 329(5990) (2010) 424-428.
- [S10] O. Farha, A. ö. Yazaydin, I. Eryazici, CD Malliakas, BG Hauser, MG Kanatzidis, ST Nguyen, RQ Snurr and JT Hupp, *Nat. Chem.* 2 (2010) 944-948.

- [S11] B. Mu, P.M. Schoenecker, K.S. Walton, Gas adsorption study on mesoporous metal-organic framework UMCM-1, *J. Phys. Chem. C* 114(14) (2010) 6464-6471.
- [S12] B. Arstad, H. Fjellvåg, K.O. Kongshaug, O. Swang, R. Blom, Amine functionalised metal organic frameworks (MOFs) as adsorbents for carbon dioxide, *Adsorption* 14(6) (2008) 755-762.
- [S13] M. Xue, Y. Liu, R.M. Schaffino, S. Xiang, X. Zhao, G.-S. Zhu, S.-L. Qiu, B. Chen, New prototype isoreticular metal-organic framework Zn<sub>4</sub>O (FMA) 3 for gas storage, *Inorg. Chem.* 48(11) (2009) 4649-4651.
- [S14] M. Park, D. Moon, J.W. Yoon, J.-S. Chang, M.S. Lah, A metal-organic framework based on an unprecedented nonanuclear cluster as a secondary building unit: structure and gas sorption behavior, *Chem. Commun.* (15) (2009) 2026-2028.
- [S15] O. Shekhah, Y. Belmabkhout, Z. Chen, V. Guillerm, A. Cairns, K. Adil, M. Eddaoudi, Made-to-order metal-organic frameworks for trace carbon dioxide removal and air capture, *Nat. Commun.* 5(1) (2014) 1-7.
- [S16] P. Nugent, Y. Belmabkhout, S.D. Burd, A.J. Cairns, R. Luebke, K. Forrest, T. Pham, S. Ma, B. Space, L. Wojtas, Porous materials with optimal adsorption thermodynamics and kinetics for CO<sub>2</sub> separation, *Nature* 495(7439) (2013) 80-84.
- [S17] Y. Lin, H. Lin, H. Wang, Y. Suo, B. Li, C. Kong, L. Chen, Enhanced selective CO<sub>2</sub> adsorption on polyamine/MIL-101 (Cr) composites, *J. Mater. Chem. A* 2(35) (2014) 14658-14665.
- [S18] R. Wang, X. Liu, D. Qi, Y. Xu, L. Zhang, X. Liu, J. Jiang, F. Dai, X. Xiao, D. Sun, A Zn metal-organic framework with high stability and sorption selectivity for CO<sub>2</sub>, *Inorg. Chem.* 54(22) (2015) 10587-10592.
- [S19] S.-J. Bao, R. Krishna, Y.-B. He, J.-S. Qin, Z.-M. Su, S.-L. Li, W. Xie, D.-Y. Du, W.-W. He, S.-R. Zhang, A stable metal-organic framework with suitable pore sizes and rich uncoordinated nitrogen atoms on the internal surface of micropores for highly efficient CO<sub>2</sub> capture, *J. Mater. Chem. A* 3(14) (2015) 7361-7367.
- [S20] J.-R. Li, J. Yu, W. Lu, L.-B. Sun, J. Sculley, P.B. Balbuena, H.-C. Zhou, Porous materials with pre-designed single-molecule traps for CO<sub>2</sub> selective adsorption, *Nat. Commun.* 4(1) (2013) 1-8.
- [S21] C. Volkringer, T. Loiseau, M. Haouas, F. Taulelle, D. Popov, M. Burghammer, C. Riekkel, C. Zlotea, F. Cuevas, M. Latroche, Occurrence of uncommon infinite chains consisting of edge-sharing octahedra in a porous metal organic framework-type aluminum pyromellitate Al<sub>4</sub>(OH)<sub>8</sub>[C<sub>10</sub>O<sub>8</sub>H<sub>2</sub>](MIL-120): Synthesis, structure, and gas sorption properties, *Chem. Mater.* 21(24) (2009) 5783-5791.

- [S22] Z. Zhang, S. Xiang, X. Rao, Q. Zheng, F.R. Fronczek, G. Qian, B. Chen, A rod packing microporous metal–organic framework with open metal sites for selective guest sorption and sensing of nitrobenzene, *Chem. Commun.* 46(38) (2010) 7205-7207.
- [S23] W. Lu, D. Yuan, T.A. Makal, J.R. Li, H.C. Zhou, A Highly Porous and Robust (3, 3, 4)-Connected Metal–Organic Framework Assembled with a 90° Bridging-Angle Embedded Octacarboxylate Ligand, *Angew. Chem.* 124(7) (2012) 1612-1616.
- [S24] P.-Q. Liao, H. Chen, D.-D. Zhou, S.-Y. Liu, C.-T. He, Z. Rui, H. Ji, J.-P. Zhang, X.-M. Chen, Monodentate hydroxide as a super strong yet reversible active site for CO<sub>2</sub> capture from high-humidity flue gas, *Energy & Env. Sci.* 8(3) (2015) 1011-1016.
- [S25] R.-B. Lin, D. Chen, Y.-Y. Lin, J.-P. Zhang, X.-M. Chen, A zeolite-like zinc triazolate framework with high gas adsorption and separation performance, *Inorg. Chem.* 51(18) (2012) 9950-9955.
- [S26] C. Song, Y. Ling, L. Jin, M. Zhang, D.-L. Chen, Y. He, CO<sub>2</sub> adsorption of three isostructural metal–organic frameworks depending on the incorporated highly polarized heterocyclic moieties, *Dalton T.* 45(1) (2016) 190-197.
- [S27] C. Song, Y. He, B. Li, Y. Ling, H. Wang, Y. Feng, R. Krishna, B. Chen, Enhanced CO<sub>2</sub> sorption and selectivity by functionalization of a NbO-type metal–organic framework with polarized benzothiadiazole moieties, *Chem. Commun.* 50(81) (2014) 12105-12108.
- [S28] C. Wang, L. Li, S. Tang, X. Zhao, Enhanced Uptake and Selectivity of CO<sub>2</sub> Adsorption in a Hydrostable Metal–Organic Frameworks via Incorporating Methylol and Methyl Groups, *ACS appl. Mater. inter.* 6(19) (2014) 16932-16940.
- [S29] M. Zhang, Q. Wang, Z. Lu, H. Liu, W. Liu, J. Bai, A nitro-decorated NbO-type metal–organic framework with a highly selective CO<sub>2</sub> uptake and CH<sub>4</sub> storage capacity, *Cryst. Eng. Comm.* 16(28) (2014) 6287-6290.
- [S30] B. Zheng, H. Liu, Z. Wang, X. Yu, P. Yi, J. Bai, Porous NbO-type metal–organic framework with inserted acylamide groups exhibiting highly selective CO<sub>2</sub> capture, *Cryst. Eng. Comm.* 15(18) (2013) 3517-3520.
- [S31] Z. Wang, B. Zheng, H. Liu, X. Lin, X. Yu, P. Yi, R. Yun, High-capacity gas storage by a microporous oxalamide-functionalized NbO-type metal–organic framework, *Cryst. growth des.* 13(11) (2013) 5001-5006.
- [S32] N.H. Alsmail, M. Suyetin, Y. Yan, R. Cabot, C.P. Krap, J. Lu, T. Easun, E. Bichoutskaia, W. Lewis, A.J. Blake, Analysis of high and selective uptake of CO<sub>2</sub> in an oxamide-containing {Cu-2(OOCR)(4)}-based metal-organic framework, *Chem. Eur. J.* 20(24) (2014) 7317-7324.

- [S33] Y. Yan, M. Suyetin, E. Bichoutskaia, A.J. Blake, D.R. Allan, S.A. Barnett, M. Schröder, Modulating the packing of [Cu<sub>24</sub>(isophthalate)<sub>24</sub>] cuboctahedra in a triazole-containing metal–organic polyhedral framework, *Chem. Sci.* 4(4) (2013) 1731-1736.
- [S34] D. Yuan, D. Zhao, D. Sun, H.C. Zhou, An isorecticular series of metal–organic frameworks with dendritic hexacarboxylate ligands and exceptionally high gas-uptake capacity, *Angew. Chem.* 122(31) (2010) 5485-5489.
- [S35] B. Zheng, J. Bai, J. Duan, L. Wojtas, M.J. Zaworotko, Enhanced CO<sub>2</sub> binding affinity of a high-uptake rht-type metal–organic framework decorated with acylamide groups, *J. Am. Chem. Soc.* 133(4) (2011) 748-751.
- [S36] B. Zheng, Z. Yang, J. Bai, Y. Li, S. Li, High and selective CO<sub>2</sub> capture by two mesoporous acylamide-functionalized rht-type metal–organic frameworks, *Chem. Commun.* 48(56) (2012) 7025-7027.
- [S37] J. Duan, Z. Yang, J. Bai, B. Zheng, Y. Li, S. Li, Highly selective CO<sub>2</sub> capture of an agw-type metal–organic framework with inserted amides: experimental and theoretical studies, *Chem. Commun.* 48(25) (2012) 3058-3060.
- [S38] J. Park, J.-R. Li, Y.-P. Chen, J. Yu, A.A. Yakovenko, Z.U. Wang, L.-B. Sun, P.B. Balbuena, H.-C. Zhou, A versatile metal–organic framework for carbon dioxide capture and cooperative catalysis, *Chem. Commun.* 48(80) (2012) 9995-9997.
- [S39] Z. Lu, H. Xing, R. Sun, J. Bai, B. Zheng, Y. Li, Water stable metal–organic framework evolutionally formed from a flexible multidentate ligand with acylamide groups for selective CO<sub>2</sub> adsorption, *Cryst. growth des.* 12(3) (2012) 1081-1084.
- [S40] V. Safarifard, S. Rodríguez-Hermida, V. Guillerm, I. Imaz, M. Bigdeli, A. Azhdari Tehrani, J. Juanhuix, A. Morsali, M.E. Casco, J. Silvestre-Albero, Influence of the amide groups in the CO<sub>2</sub>/N<sub>2</sub> selectivity of a series of isorecticular, interpenetrated metal–organic frameworks, *Cryst. growth des.* 16(10) (2016) 6016-6023.
- [S41] T.A. Ablott, M. Turzer, S.G. Telfer, C. Richardson, High Temperature Postsynthetic Rearrangement of Dimethylthiocarbamate-Functionalized Metal–Organic Frameworks, *Cryst. growth des.* 16(12) (2016) 7067-7073.
- [S42] S. Galli, A. Maspero, C. Giacobbe, G. Palmisano, L. Nardo, A. Comotti, I. Bassanetti, P. Sozzani, N. Masciocchi, When long bis (pyrazolates) meet late transition metals: structure, stability and adsorption of metal–organic frameworks featuring large parallel channels, *J. Mater. Chem. A* 2(31) (2014) 12208-12221.

- [S43] N.C. Burtch, H. Jasuja, D. Dubbeldam, K.S. Walton, Molecular-level insight into unusual low pressure CO<sub>2</sub> affinity in pillared metal–organic frameworks, *J. Am. Chem. Soc.* 135(19) (2013) 7172-7180.
- [S44] C.H. Lau, R. Babarao, M.R. Hill, A route to drastic increase of CO<sub>2</sub> uptake in Zr metal organic framework UiO-66, *Chem. Commun.* 49(35) (2013) 3634-3636.
- [S45] X. Zhao, X. Bu, Q.-G. Zhai, H. Tran, P. Feng, Pore space partition by symmetry-matching regulated ligand insertion and dramatic tuning on carbon dioxide uptake, *J. Am. Chem. Soc.* 137(4) (2015) 1396-1399.
- [S46] G.-T. Vuong, M.-H. Pham, T.-O. Do, Synthesis and engineering porosity of a mixed metal Fe<sub>2</sub>Ni MIL-88B metal–organic framework, *Dalton T.* 42(2) (2012) 550-557.
- [S47] T.M. McDonald, D.M. D'Alessandro, R. Krishna, J.R. Long, Enhanced carbon dioxide capture upon incorporation of N, N'-dimethylethylenediamine in the metal–organic framework CuBTTri, *Chem. Sci.* 2(10) (2011) 2022-2028.
- [S48] A. Demessence, D.M. D'Alessandro, M.L. Foo, J.R. Long, Strong CO<sub>2</sub> binding in a water-stable, triazolate-bridged metal–organic framework functionalized with ethylenediamine, *J. Am. Chem. Soc.* 131(25) (2009) 8784-8786.
- [S49] Z. Guo, H. Wu, G. Srinivas, Y. Zhou, S. Xiang, Z. Chen, Y. Yang, W. Zhou, M. O'Keeffe, B. Chen, A metal–organic framework with optimized open metal sites and pore spaces for high methane storage at room temperature, *Angew. Chem. Inter. Ed.* 50(14) (2011) 3178-3181.
- [S50] Z. Chen, S. Xiang, H.D. Arman, P. Li, D. Zhao, B. Chen, Significantly enhanced CO<sub>2</sub>/CH<sub>4</sub> separation selectivity within a 3D prototype metal–organic framework functionalized with OH groups on pore surfaces at room temperature, *Eur. J. Inorg. Chem.* 2011(14) (2011) 2227.
- [S51] Y. He, Z. Zhang, S. Xiang, H. Wu, F.R. Fronczek, W. Zhou, R. Krishna, M.O. Keeffe, B. Chen, High separation capacity and selectivity of C<sub>2</sub> hydrocarbons over methane within a microporous metal–organic framework at room temperature, *Chem. A Eur. J.* 18(7) (2012) 1901-1904.
- [S52] Z. Chen, S. Xiang, H.D. Arman, J.U. Mondal, P. Li, D. Zhao, B. Chen, Three-Dimensional Pillar-Layered Copper (II) Metal–Organic Framework with Immobilized Functional OH Groups on Pore Surfaces for Highly Selective CO<sub>2</sub>/CH<sub>4</sub> and C<sub>2</sub>H<sub>2</sub>/CH<sub>4</sub> Gas Sorption at Room Temperature, *Inorg. Chem.* 50(8) (2011) 3442-3446.
- [S53] Z. Zhang, S. Xiang, Y.-S. Chen, S. Ma, Y. Lee, T. Phely-Bobin, B. Chen, A Robust Highly Interpenetrated Metal–Organic Framework Constructed from Pentanuclear Clusters for Selective Sorption of Gas Molecules, *Inorg. Chem.* 49(18) (2010) 8444-8448.



[S54] Z. Chen, S. Xiang, H.D. Arman, P. Li, S. Tidrow, D. Zhao, B. Chen, A microporous metal–organic framework with immobilized–OH functional groups within the pore surfaces for selective gas sorption, WILEY VCH Verlag Weinheim, 2010.

[S55] Z. Guo, H. Xu, S. Su, J. Cai, S. Dang, S. Xiang, G. Qian, H. Zhang, M. O’keeffe, B. Chen, A robust near infrared luminescent ytterbium metal–organic framework for sensing of small molecules, *Chem. Commun.* 47(19) (2011) 5551-5553.

[S56] J. An, S.J. Geib, N.L. Rosi, High and selective CO<sub>2</sub> uptake in a cobalt adeninate metal–organic framework exhibiting pyrimidine-and amino-decorated pores, *J. Am. Chem. Soc.* 132(1) (2010) 38-39.

[S57] J. Kim, S.-T. Yang, S.B. Choi, J. Sim, J. Kim, W.-S. Ahn, Control of catenation in CuTATB-n metal–organic frameworks by sonochemical synthesis and its effect on CO<sub>2</sub> adsorption, *J. Mater. Chem.* 21(9) (2011) 3070-3076.

[S58] R. Babarao, C.J. Coghlan, D. Rankine, W.M. Bloch, G.K. Gransbury, H. Sato, S. Kitagawa, C.J. Sumby, M.R. Hill, C.J. Doonan, Does functionalisation enhance CO<sub>2</sub> uptake in interpenetrated MOFs? An examination of the IRMOF-9 series, *Chem. Commun* 50(24) (2014) 3238-3241.

[S59] S. Chaemchuen, K. Zhou, N.A. Kabir, Y. Chen, X. Ke, G. Van Tendeloo, F. Verpoort, Tuning metal sites of DABCO MOF for gas purification at ambient conditions, *Micropor. Mesopor. Mat.* 201 (2015) 277-285.

[S60] Y. He, H. Furukawa, C. Wu, M. O’Keeffe, R. Krishna, B. Chen, Low-energy regeneration and high productivity in a lanthanide–hexacarboxylate framework for high-pressure CO<sub>2</sub>–CH<sub>4</sub>–H<sub>2</sub> separation, *Chem. Commun* 49(60) (2013) 6773-6775.

[S61] Y. He, S. Xiang, Z. Zhang, S. Xiong, C. Wu, W. Zhou, T. Yildirim, R. Krishna, B. Chen, A microporous metal–organic framework assembled from an aromatic tetracarboxylate for H<sub>2</sub> purification, *J. Mater. Chem. A* 1(7) (2013) 2543-2551.

[S62] D. Zhao, D. Yuan, A. Yakovenko, H.-C. Zhou, A NbO-type metal–organic framework derived from a polyyne-coupled di-isophthalate linker formed in situ, *Chem. Commun* 46(23) (2010) 4196-4198.

[S63] T.K. Prasad, D.H. Hong, M.P. Suh, High Gas Sorption and Metal-Ion Exchange of Microporous Metal–Organic Frameworks with Incorporated Imide Groups, *Chem. A Eur. J.* 16(47) (2010) 14043-14050.

[S64] Y. Peng, G. Srinivas, C.E. Wilmer, I. Eryazici, R.Q. Snurr, J.T. Hupp, T. Yildirim, O.K. Farha, Simultaneously high gravimetric and volumetric methane uptake characteristics of the metal–organic framework NU-111, *Chem. Commun* 49(29) (2013) 2992-2994.

- [S65] S. Xiong, Y. Gong, H. Wang, H. Wang, Q. Liu, M. Gu, X. Wang, B. Chen, Z. Wang, A new tetrazolate zeolite-like framework for highly selective CO<sub>2</sub>/CH<sub>4</sub> and CO<sub>2</sub>/N<sub>2</sub> separation, *Chem. Commun* 50(81) (2014) 12101-12104.
- [S66] S. Orefuwa, E. Iriowen, H. Yang, B. Wakefield, A. Goudy, Effects of nitro-functionalization on the gas adsorption properties of isorecticular metal-organic framework-eight (IRMOF-8), *Micropor. Mesopor. Mat.* 177 (2013) 82-90.
- [S67] J. Cai, X. Rao, Y. He, J. Yu, C. Wu, W. Zhou, T. Yildirim, B. Chen, G. Qian, A highly porous NbO type metal-organic framework constructed from an expanded tetracarboxylate, *Chem. Commun* 50(13) (2014) 1552-1554.
- [S68] W.-Y. Gao, T. Pham, K.A. Forrest, B. Space, L. Wojtas, Y.-S. Chen, S. Ma, The local electric field favours more than exposed nitrogen atoms on CO<sub>2</sub> capture: a case study on the rht-type MOF platform, *Chem. Commun* 51(47) (2015) 9636-9639.
- [S69] Z. Liang, J. Du, L. Sun, J. Xu, Y. Mu, Y. Li, J. Yu, R. Xu, Design and synthesis of two porous metal-organic frameworks with Nbo and Agw topologies showing high CO<sub>2</sub> adsorption capacity, *Inorg. Chem.* 52(19) (2013) 10720-10722.
- [S70] X. Duan, J. Yu, J. Cai, Y. He, C. Wu, W. Zhou, T. Yildirim, Z. Zhang, S. Xiang, M. O'Keeffe, A microporous metal-organic framework of a rare sty topology for high CH<sub>4</sub> storage at room temperature, *Chem. Commun* 49(20) (2013) 2043-2045.
- [S71] X. Rao, J. Cai, J. Yu, Y. He, C. Wu, W. Zhou, T. Yildirim, B. Chen, G. Qian, A microporous metal-organic framework with both open metal and Lewis basic pyridyl sites for high C<sub>2</sub>H<sub>2</sub> and CH<sub>4</sub> storage at room temperature, *Chem. Commun* 49(60) (2013) 6719-6721.
- [S72] Q.-G. Zhai, X. Bu, C. Mao, X. Zhao, P. Feng, Systematic and dramatic tuning on gas sorption performance in heterometallic metal-organic frameworks, *J. Am. Chem. Soc.* 138(8) (2016) 2524-2527.
- [S73] S.-T. Zheng, T. Wu, C. Chou, A. Fuhr, P. Feng, X. Bu, Development of composite inorganic building blocks for MOFs, *J. Am. Chem. Soc.* 134(10) (2012) 4517-4520.
- [S74] S.T. Zheng, J.J. Bu, T. Wu, C. Chou, P. Feng, X. Bu, Porous indium-organic frameworks and systematization of structural building blocks, *Angew. Chem. Inter. Ed.* 50(38) (2011) 8858-8862.
- [S75] A.M. Fracaroli, H. Furukawa, M. Suzuki, M. Dodd, S. Okajima, F. Gándara, J.A. Reimer, O.M. Yaghi, Metal-organic frameworks with precisely designed interior for carbon dioxide capture in the presence of water, *J. Am. Chem. Soc.* 136(25) (2014) 8863-8866.

- [S76] E. Deniz, F. Karadas, H.A. Patel, S. Aparicio, C.T. Yavuz, M. Atilhan, A combined computational and experimental study of high pressure and supercritical CO<sub>2</sub> adsorption on Basolite MOFs, *Micropor. Mesopor. Mat.* 175 (2013) 34-42.
- [S77] M. Taddei, F. Costantino, F. Marmottini, A. Comotti, P. Sozzani, R. Vivani, The first route to highly stable crystalline microporous zirconium phosphonate metal–organic frameworks, *Chem. Commun* 50(94) (2014) 14831-14834.
- [S78] T. Li, D.-L. Chen, J.E. Sullivan, M.T. Kozlowski, J.K. Johnson, N.L. Rosi, Systematic modulation and enhancement of CO<sub>2</sub>: N<sub>2</sub> selectivity and water stability in an isorecticular series of bio-MOF-11 analogues, *Chem. Sci.* 4(4) (2013) 1746-1755.
- [S79] E. Keceli, M. Hemgesberg, R. Grünker, V. Bon, C. Wilhelm, T. Philippi, R. Schoch, Y. Sun, M. Bauer, S. Ernst, A series of amide functionalized isorecticular metal organic frameworks, *Micropor. Mesopor. Mat.* 194 (2014) 115-125.
- [S80] W. Zhuang, D. Yuan, D. Liu, C. Zhong, J.-R. Li, H.-C. Zhou, Robust metal–organic framework with an octatopic ligand for gas adsorption and separation: combined characterization by experiments and molecular simulation, *Chem. Mater.* 24(1) (2012) 18-25.
- [S81] M.R. Bryant, A.D. Burrows, C.J. Kepert, P.D. Southon, O.T. Qazvini, S.G. Telfer, C. Richardson, Mixed-Component Sulfone–Sulfoxide Tagged Zinc IRMOFs: In Situ Ligand Oxidation, Carbon Dioxide, and Water Sorption Studies, *Cryst. Growth Des.* 17(4) (2017) 2016-2023.
- [S82] W. Liang, R. Babarao, T.L. Church, D.M. D'Alessandro, Tuning the cavities of zirconium-based MIL-140 frameworks to modulate CO<sub>2</sub> adsorption, *Chem. Commun* 51(56) (2015) 11286-11289.
- [S83] L. Hou, W.-J. Shi, Y.-Y. Wang, Y. Guo, C. Jin, Q.-Z. Shi, A rod packing microporous metal–organic framework: unprecedented ukv topology, high sorption selectivity and affinity for CO<sub>2</sub>, *Chem. Commun* 47(19) (2011) 5464-5466.
- [S84] Y.G. Lee, H.R. Moon, Y.E. Cheon, M.P. Suh, A comparison of the H<sub>2</sub> sorption capacities of isostructural metal–organic frameworks with and without accessible metal sites:  $[Zn_2(abtc)(dmf)_2]_3$  and  $[Cu_2(abtc)(dmf)_2]_3$  versus  $[Cu_2(abtc)]_3$ , *Angew. Chem.* 120(40) (2008) 7855-7859.
- [S85] H.J. Park, Y.E. Cheon, M.P. Suh, Post Synthetic Reversible Incorporation of Organic Linkers into Porous Metal–Organic Frameworks through Single-Crystal-to-Single-Crystal Transformations and Modification of Gas-Sorption Properties, *Chem. A Eur. J.* 16(38) (2010) 11662-11669.

[S86] P. Kumar, A. Kumar, CORAL: QSAR models of CB1 cannabinoid receptor inhibitors based on local and global SMILES attributes with the index of ideality of correlation and the correlation contradiction index, *Chemometr. Intell. Lab. Sys.* 200 (2020) 103982.

[S87] A. Shayanfar, S. Shayanfar, Is regression through origin useful in external validation of QSAR models?, *Eur. J. Pharm. Sci.* 59 (2014) 31-35.

[S88] N. Chirico, P. Gramatica, Real external predictivity of QSAR models: how to evaluate it? Comparison of different validation criteria and proposal of using the concordance correlation coefficient, *J. chem. Inform. Model.* 51(9) (2011) 2320-2335.

[S89] I. Lawrence, K. Lin, Assay validation using the concordance correlation coefficient, *Biometrics* (1992) 599-604.
